# Supplementary material for: De novo sequencing, assembly and analysis of the genome of the laboratory strain Saccharomyces cerevisiae CEN.PK113-7D, a model for modern industrial biotechnology
Source: Microb Cell Fact. 2012 Mar 26;11:36. doi: 10.1186/1475-2859-11-36 (PMC3364882; doi:10.1186/1475-2859-11-36)
Supplement: Additional file 7 — Table S4. Mutations in the galactose uptake and ergosterol biosynthesis pathways compared to the SNVs found previously in CEN.PK113-7D [35]. [file 1475-2859-11-36-S7.XLSX]

## Sheet: cenpk vs s288c in erg and gal
Gene name (systematic name)	nucleotide position	Nucleotide (S288c)	Nucleotide (CEN.PK113-7D)	Amino Acis Position	Amino Acid (S288c)	Amino Acid (CEN.PK113-7D)	Otero (2010)
	70	A	C	24	T	P	no
	146	G	A	49	G	E	yes
	224	G	C	75	S	T	yes
	574	G	T	192	A	S	yes
	739	G	A	247	D	N	yes
	1222	A	G	408	T	A	no
ERG8(YMR220W)	1258	A	G	420	N	D	no
	72	A	G	24	T	T	no
	306	A	G	102	K	K	yes
	387	T	C	129	D	D	yes
	759	T	A	253	I	I	yes
	879	A	G	293	P	P	yes
	1038	A	G	346	E	E	yes
	856	G	A	256	G	S	yes
	480	A	G	160	L	L	no
ERG9(YHR190W)	678	T	C	226	D	D	no
	1125	G	A	375	Q	Q	yes
	1128	T	C	376	F	F	yes
	1233	T	C	411	V	V	no
	890	T	C	297	L	P	yes
	1241	C	A	414	A	E	yes
	363	G	A	121	S	S	no
GAL1(YBR020W)	603	T	C	201	I	I	no
	1089	A	G	363	A	A	yes
	1257	C	T	419	D	D	yes
	1530	A	T	510	L	L	yes
	1542	C	T	514	I	I	no
	479	C	A	160	T	N	no
	550	A	G	184	S	G	no
	787	C	A	263	Q	K	yes
	1554	G	C	518	C	G	yes
GAL10(YBR019C)	1798	T	G	600	C	G	yes
	1590	G	A	530	T	T	yes
	1677	A	G	559	S	S	yes
	1827	G	A	609	K	K	yes
	1941	T	C	647	Y	Y	no
	1992	T	C	664	I	I	no
	1125	T	C	375	I	I	no
PGM2(YMR105C)	966	C	T	322	I	I	no
	267	C	T	89	G	G	no
	8	C	T	3	P	L	no
	426	T	C	142	S	S	not in Table
	1167	A	G	389	K	K	not in Table
HMG1(YML075C)	1248	T	C	416	F	F	not in Table
	1557	G	A	519	L	L	not in Table
	1605	A	G	535	K	K	not in Table
	2451	A	G	817	K	K	not in Table
	2787	T	C	929	V	V	not in Table
	2940	G	A	980	P	P	not in Table
ERG12(YMR208W)	1119	C	T	373	S	S	no
	924	A	C	308	E	D	no
	952	A	G	318	I	V	no
	157	C	T	53	L	L	not in Table
	249	C	T	83	A	A	not in Table
	477	G	A	159	E	E	not in Table
	630	C	T	210	A	A	not in Table
	651	G	A	217	T	T	not in Table
	705	C	T	235	Y	Y	not in Table
ERG20(YJL167W)	816	G	A	272	L	L	not in Table
	921	T	C	307	I	I	not in Table
	928	C	T	310	L	L	not in Table
	975	A	G	325	K	K	not in Table
	978	T	C	326	I	I	not in Table
	981	T	C	327	S	S	not in Table
	984	G	A	328	Q	Q	not in Table
	990	T	C	330	D	D	not in Table
	1011	T	C	337	A	A	not in Table
	1014	T	C	338	D	D	not in Table
	1029	C	T	343	F	F	not in Table
	1038	A	G	346	K	K	not in Table
	1053	C	T	351	S	S	not in Table
	1059	G	A	353	*	*	not in Table
ERG1(YGR175C)	No differences
MVD1(YNR043W)	No differences
IDI1(YPL117C)	No differences
PGM1(YKL127W)	No differences
Erg10(YPL028W)	No differences
Erg13(YML126C)	No differences
HMG2(YLR450W)	No differences
