# Supplementary material for: De novo sequencing, assembly and analysis of the genome of the laboratory strain Saccharomyces cerevisiae CEN.PK113-7D, a model for modern industrial biotechnology
Source: Microb Cell Fact. 2012 Mar 26;11:36. doi: 10.1186/1475-2859-11-36 (PMC3364882; doi:10.1186/1475-2859-11-36)
Supplement: Additional file 10 — Table S3. Indels in genes in CEN.PK113-7D compared to S288C. [file 1475-2859-11-36-S10.XLSX]

## Sheet: Table S3 indels
ID	Source	Chr	Type	start mut	end mut	gene	start gene	end gene	strand	ref	query	Gene names	Description
23061	dnadiffSNV	chrVI	deletion	186246	186269	YFR019W	184502	191338	1	ATAATAATAATAATAATAATAATA	.	['FAB1', 'SVL7']	['1-phosphatidylinositol-3-phosphate 5-kinase; vacuolar membrane kinase that generates phosphatidylinositol (3,5)P2, which is involved in vacuolar sorting and homeostasis']
23062	dnadiffSNV	chrVI	insertion	190180	190180	YFR019W	184502	191338	1	.	CAG	['FAB1', 'SVL7']	['1-phosphatidylinositol-3-phosphate 5-kinase; vacuolar membrane kinase that generates phosphatidylinositol (3,5)P2, which is involved in vacuolar sorting and homeostasis']
22327	dnadiffSNV	chrIV	deletion	654355	654357	YDR099W	652781	654428	1	AAC	.	['BMH2', 'SCD3']	['14-3-3 protein, minor isoform; controls proteome at post-transcriptional level, binds proteins and DNA, involved in regulation of many processes including exocytosis, vesicle transport, Ras/MAPK signaling, and rapamycin-sensitive signaling']
23425	dnadiffSNV	chrVIII	insertion	193543	193543	YHR043C	192805	193545	-1	.	T	['DOG2']	['2-deoxyglucose-6-phosphate phosphatase, member of a family of low molecular weight phosphatases, similar to Dog1p, induced by oxidative and osmotic stress, confers 2-deoxyglucose resistance when overexpressed']
22041	dnadiffSNV	chrII	insertion	293774	293774	YBR026C	292877	294019	-1	.	T	['ETR1', 'MRF1', "MRF1'"]	['2-enoyl thioester reductase, member of the medium chain dehydrogenase/reductase family; localized to in mitochondria, where it has a probable role in fatty acid synthesis']
22410	dnadiffSNV	chrIV	deletion	927988	927988	YDR232W	927452	929098	1	T	.	['HEM1', 'CYD1', 'OLE3']	['5-aminolevulinate synthase, catalyzes the first step in the heme biosynthetic pathway; an N-terminal signal sequence is required for localization to the mitochondrial matrix; expression is regulated by Hap2p-Hap3p']
21955	dnadiffSNV	chrII	insertion	105331	105331	YBL061C	105316	107406	-1	.	T	['SKT5', 'CAL2', 'CHS4', 'CSD4']	['Activator of Chs3p (chitin synthase III), recruits Chs3p to the bud neck via interaction with Bni4p; has similarity to Shc1p, which activates Chs3p during sporulation']
21956	dnadiffSNV	chrII	insertion	105348	105348	YBL061C	105316	107406	-1	.	T	['SKT5', 'CAL2', 'CHS4', 'CSD4']	['Activator of Chs3p (chitin synthase III), recruits Chs3p to the bud neck via interaction with Bni4p; has similarity to Shc1p, which activates Chs3p during sporulation']
22165	dnadiffSNV	chrIII	deletion	212107	212122	YCR048W	211929	213761	1	CTGAAGGAGTGGAGTC	.	['ARE1', 'SAT2']	['Acyl-CoA:sterol acyltransferase, isozyme of Are2p; endoplasmic reticulum enzyme that contributes the major sterol esterification activity in the absence of oxygen']
22166	dnadiffSNV	chrIII	deletion	212124	212125	YCR048W	211929	213761	1	AC	.	['ARE1', 'SAT2']	['Acyl-CoA:sterol acyltransferase, isozyme of Are2p; endoplasmic reticulum enzyme that contributes the major sterol esterification activity in the absence of oxygen']
24443	dnadiffSNV	chrXIV	deletion	472578	472578	YNL083W	471377	472861	1	G	.	['SAL1']	['ADP/ATP transporter; member of the Ca2+-binding subfamily of mitochondrial carriers, with two EF-hand motifs; transport activity of either Sal1p or Pet9p is critical for viability; polymorphic in different S. cerevisiae strains']
22213	dnadiffSNV	chrIV	insertion	7730	7730	YDL247W	5985	7814	1	.	C	['MPH2']	['Alpha-glucoside permease, transports maltose, maltotriose, alpha-methylglucoside, and turanose; identical to Mph3p; encoded in a subtelomeric position in a region likely to have undergone duplication']
22930	dnadiffSNV	chrV	deletion	339471	339471	YER090W	337949	339472	1	A	.	['TRP2']	['Anthranilate synthase, catalyzes the initial step of tryptophan biosynthesis, forms multifunctional hetero-oligomeric anthranilate synthase:indole-3-glycerol phosphate synthase enzyme complex with Trp3p']
23497	dnadiffSNV	chrX	deletion	47037	47037	YJL207C	41389	47433	-1	T	.	['LAA1']	['AP-1 accessory protein; colocalizes with clathrin to the late-Golgi apparatus; involved in TGN-endosome transport; physically interacts with AP-1; similar to the mammalian p200; may interact with ribosomes; YJL207C is a non-essential gene']
24390	dnadiffSNV	chrXIV	insertion	137513	137513	YNL270C	135940	137661	-1	.	CAT	['ALP1', 'APL1']	['Arginine transporter; expression is normally very low and it is unclear what conditions would induce significant expression']
24572	dnadiffSNV	chrXV	insertion	384323	384323	YOR028C	383533	384420	-1	.	T	['CIN5', 'HAL6', 'YAP4']	['Basic leucine zipper (bZIP) transcription factor of the yAP-1 family, mediates pleiotropic drug resistance and salt tolerance; nuclearly localized under oxidative stress and sequestered in the cytoplasm by Lot6p under reducing conditions']
22150	dnadiffSNV	chrIII	insertion	91570	91570	YCL018W	91324	92418	1	.	G	['LEU2']	['Beta-isopropylmalate dehydrogenase (IMDH), catalyzes the third step in the leucine biosynthesis pathway']
22151	dnadiffSNV	chrIII	insertion	92113	92113	YCL018W	91324	92418	1	.	G	['LEU2']	['Beta-isopropylmalate dehydrogenase (IMDH), catalyzes the third step in the leucine biosynthesis pathway']
22195	dnadiffSNV	chrIII	deletion	271208	271210	YCR089W	267434	272263	1	TCA	.	['FIG2']	['Cell wall adhesin, expressed specifically during mating; may be involved in maintenance of cell wall integrity during mating']
22196	dnadiffSNV	chrIII	insertion	271501	271501	YCR089W	267434	272263	1	.	TCATCATCATCATCATCATCATCATCA	['FIG2']	['Cell wall adhesin, expressed specifically during mating; may be involved in maintenance of cell wall integrity during mating']
24560	dnadiffSNV	chrXV	deletion	344859	344861	YOR009W	344335	345798	1	CGT	.	['TIR4']	['Cell wall mannoprotein of the Srp1p/Tip1p family of serine-alanine-rich proteins; expressed under anaerobic conditions and required for anaerobic growth; transcription is also induced by cold shock']
24451	dnadiffSNV	chrXIV	insertion	501666	501666	YNL066W	501157	502777	1	.	GGGC	['SUN4', 'SCW3']	['Cell wall protein related to glucanases, possibly involved in cell wall septation; member of the SUN family']
24452	dnadiffSNV	chrXIV	insertion	501668	501668	YNL066W	501157	502777	1	.	TTGCAGTTACATACT	['SUN4', 'SCW3']	['Cell wall protein related to glucanases, possibly involved in cell wall septation; member of the SUN family']
22802	dnadiffSNV	chrV	deletion	79231	79231	YEL040W	78053	79456	1	A	.	['UTR2', 'CRH2']	['Chitin transglycosylase that functions in the transfer of chitin to beta(1-6) and beta(1-3) glucans in the cell wall; similar to and functionally redundant with Crh1; glycosylphosphatidylinositol (GPI)-anchored protein localized to bud neck']
22803	dnadiffSNV	chrV	deletion	79233	79234	YEL040W	78053	79456	1	CA	.	['UTR2', 'CRH2']	['Chitin transglycosylase that functions in the transfer of chitin to beta(1-6) and beta(1-3) glucans in the cell wall; similar to and functionally redundant with Crh1; glycosylphosphatidylinositol (GPI)-anchored protein localized to bud neck']
24412	dnadiffSNV	chrXIV	deletion	221044	221044	YNL227C	220659	222431	-1	T	.	['JJJ1']	['Co-chaperone that stimulates the ATPase activity of Ssa1p, required for a late step of ribosome biogenesis; associated with the cytosolic large ribosomal subunit; contains a J-domain; mutation causes defects in fluid-phase endocytosis']
22463	dnadiffSNV	chrIV	deletion	1441044	1441044	YDR495C	1438115	1441150	-1	T	.	['VPS3', 'PEP6', 'VPL3', 'VPT17']	['Component of CORVET tethering complex; cytoplasmic protein required for the sorting and processing of soluble vacuolar proteins, acidification of the vacuolar lumen, and assembly of the vacuolar H+-ATPase']
22199	dnadiffSNV	chrIII	insertion	283221	283221	YCR093W	280117	286443	1	.	AGG	['CDC39', 'NOT1', 'ROS1', 'SMD6']	['Component of the CCR4-NOT complex, which has multiple roles in regulating mRNA levels including regulation of transcription and destabilizing mRNAs by deadenylation; basal transcription factor']
22002	dnadiffSNV	chrII	insertion	201370	201370	YBL014C	199064	201748	-1	.	ACC	['RRN6']	['Component of the core factor (CF) rDNA transcription factor complex; CF is required for transcription of 35S rRNA genes by RNA polymerase I and is composed of Rrn6p, Rrn7p, and Rrn11p']
23773	dnadiffSNV	chrXI	deletion	451579	451584	YKR007W	451434	451988	1	ACGAAC	.	['MEH1', 'EGO1', 'GSE2']	['Component of the EGO complex, which is involved in the regulation of microautophagy, and of the GSE complex, which is required for proper sorting of amino acid permease Gap1p; loss results in a defect in vacuolar acidification']
24063	dnadiffSNV	chrXII	insertion	956138	956138	YLR417W	955010	956710	1	.	AAACCAAGACATTGA	['VPS36', 'GRD12', 'VAC3', 'VPL11']	['Component of the ESCRT-II complex; contains the GLUE (GRAM Like Ubiquitin binding in EAP45) domain which is involved in interactions with ESCRT-I and ubiquitin-dependent sorting of proteins into the endosome']
24216	dnadiffSNV	chrXIII	insertion	451221	451221	YMR091C	450058	451365	-1	.	TTC	['NPL6', 'RSC7']	['Component of the RSC chromatin remodeling complex; interacts with Rsc3p, Rsc30p, Ldb7p, and Htl1p to form a module important for a broad range of RSC functions; involved in nuclear protein import and maintenance of proper telomere length']
23245	dnadiffSNV	chrVII	insertion	602608	602608	YGR056W	601661	604447	1	.	T	['RSC1']	['Component of the RSC chromatin remodeling complex; required for expression of mid-late sporulation-specific genes; contains two essential bromodomains, a bromo-adjacent homology (BAH) domain, and an AT hook']
22220	dnadiffSNV	chrIV	insertion	110902	110902	YDL195W	107208	111029	1	.	GGGG	['SEC31', 'WEB1']	['Component of the Sec13p-Sec31p complex of the COPII vesicle coat, required for vesicle formation in ER to Golgi transport; mutant has increased aneuploidy tolerance']
22221	dnadiffSNV	chrIV	insertion	110913	110913	YDL195W	107208	111029	1	.	A	['SEC31', 'WEB1']	['Component of the Sec13p-Sec31p complex of the COPII vesicle coat, required for vesicle formation in ER to Golgi transport; mutant has increased aneuploidy tolerance']
24454	dnadiffSNV	chrXIV	insertion	535732	535732	YNL049C	535281	537911	-1	.	A	['SFB2', 'ISS1']	['Component of the Sec23p-Sfb2p heterodimer of the COPII vesicle coat, required for cargo selection during vesicle formation in ER to Golgi transport; homologous to Sec24p and Sfb3p']
24413	dnadiffSNV	chrXIV	deletion	223811	223811	YNL225C	222724	224469	-1	T	.	['CNM67']	['Component of the spindle pole body outer plaque; required for spindle orientation and mitotic nuclear migration']
23594	dnadiffSNV	chrX	insertion	175772	175772	YJL129C	173599	177306	-1	.	CAT	['TRK1']	['Component of the Trk1p-Trk2p potassium transport system; 180 kDa high affinity potassium transporter; phosphorylated in vivo and interacts physically with the phosphatase Ppz1p, suggesting Trk1p acitivy is regulated by phosphorylation']
24760	dnadiffSNV	chrXVI	deletion	613480	613481	YPR025C	613377	614558	-1	TT	.	['CCL1']	['Cyclin associated with protein kinase Kin28p, which is the TFIIH-associated carboxy-terminal domain (CTD) kinase involved in transcription initiation at RNA polymerase II promoters']
23756	dnadiffSNV	chrXI	insertion	277702	277702	YKL087C	277189	277863	-1	.	CCCCCCC	['CYT2']	['Cytochrome c1 heme lyase, involved in maturation of cytochrome c1, which is a subunit of the mitochondrial ubiquinol-cytochrome-c reductase; links heme covalently to apocytochrome c1']
22957	dnadiffSNV	chrV	insertion	384834	384834	YER111C	382595	385876	-1	.	GAT	['SWI4', 'ART1']	['DNA binding component of the SBF complex (Swi4p-Swi6p), a transcriptional activator that in concert with MBF (Mbp1-Swi6p) regulates late G1-specific transcription of targets including cyclins and genes required for DNA synthesis and repair']
24099	dnadiffSNV	chrXIII	deletion	44389	44393	YML113W	44045	44791	1	GCAGC	.	['DAT1']	['DNA binding protein that recognizes oligo(dA).oligo(dT) tracts; Arg side chain in its N-terminal pentad Gly-Arg-Lys-Pro-Gly repeat is required for DNA-binding; not essential for viability']
24100	dnadiffSNV	chrXIII	deletion	44395	44395	YML113W	44045	44791	1	G	.	['DAT1']	['DNA binding protein that recognizes oligo(dA).oligo(dT) tracts; Arg side chain in its N-terminal pentad Gly-Arg-Lys-Pro-Gly repeat is required for DNA-binding; not essential for viability']
23897	dnadiffSNV	chrXII	deletion	205124	205124	YLR032W	204991	208500	1	A	.	['RAD5', 'REV2', 'SNM2']	['DNA helicase proposed to promote replication fork regression during postreplication repair by template switching; RING finger containing ubiquitin ligase; stimulates the synthesis of free and PCNA-bound polyubiquitin chains by Ubc13p-Mms2p']
23898	dnadiffSNV	chrXII	deletion	205126	205127	YLR032W	204991	208500	1	GA	.	['RAD5', 'REV2', 'SNM2']	['DNA helicase proposed to promote replication fork regression during postreplication repair by template switching; RING finger containing ubiquitin ligase; stimulates the synthesis of free and PCNA-bound polyubiquitin chains by Ubc13p-Mms2p']
22155	dnadiffSNV	chrIII	deletion	139200	139200	YCR014C	139185	140933	-1	T	.	['POL4', 'POLX']	['DNA polymerase IV, undergoes pair-wise interactions with Dnl4p-Lif1p and Rad27p to mediate repair of DNA double-strand breaks by non-homologous end joining (NHEJ); homologous to mammalian DNA polymerase beta']
22057	dnadiffSNV	chrII	insertion	383177	383177	YBR073W	383112	385988	1	.	G	['RDH54', 'TID1']	['DNA-dependent ATPase, stimulates strand exchange by modifying the topology of double-stranded DNA; involved in recombinational repair of DNA double-strand breaks during mitosis and meiosis; proposed to be involved in crossover interference']
24412	dnadiffSNV	chrXIV	deletion	221044	221044	YNL228W	220645	221421	1	T	.	None	['Dubious open reading frame unlikely to encode a functional protein, based on available experimental and comparative sequence data; almost completely overlaps ORF YNL227C/JJJ1']
22848	dnadiffSNV	chrV	insertion	243735	243735	YER046W-A	243700	244029	1	.	CGCTT	None	['Dubious open reading frame unlikely to encode a functional protein, based on available experimental and comparative sequence data']
22849	dnadiffSNV	chrV	insertion	243812	243812	YER046W-A	243700	244029	1	.	TCA	None	['Dubious open reading frame unlikely to encode a functional protein, based on available experimental and comparative sequence data']
22940	dnadiffSNV	chrV	insertion	355237	355237	YER097W	355140	355469	1	.	G	None	['Dubious open reading frame unlikely to encode a functional protein, based on available experimental and comparative sequence data']
23715	dnadiffSNV	chrXI	insertion	457	457	YKL225W	451	798	1	.	A	None	['Dubious open reading frame unlikely to encode a functional protein, based on available experimental and comparative sequence data']
23722	dnadiffSNV	chrXI	deletion	63887	63887	YKL202W	63821	64402	1	G	.	None	['Dubious open reading frame unlikely to encode a functional protein, based on available experimental and comparative sequence data']
24575	dnadiffSNV	chrXV	deletion	384812	384818	YOR029W	384600	384935	1	TTTTTTT	.	None	['Dubious open reading frame unlikely to encode a functional protein, based on available experimental and comparative sequence data']
24576	dnadiffSNV	chrXV	deletion	384895	384896	YOR029W	384600	384935	1	CT	.	None	['Dubious open reading frame unlikely to encode a functional protein, based on available experimental and comparative sequence data']
24634	dnadiffSNV	chrXV	deletion	761560	761560	YOR225W	761392	761721	1	A	.	None	['Dubious open reading frame unlikely to encode a functional protein, based on available experimental and comparative sequence data']
22506	dnadiffSNV	chrIX	deletion	37211	37211	YIL163C	36899	37252	-1	T	.	None	['Dubious open reading frame unlikely to encode a functional protein, based on available experimental and comparative sequence data']
24007	dnadiffSNV	chrXII	deletion	680989	680989	YLR269C	680866	681216	-1	C	.	None	['Dubious open reading frame unlikely to encode a functional protein, based on available experimental and comparative sequence data']
24008	dnadiffSNV	chrXII	insertion	681154	681154	YLR269C	680866	681216	-1	.	A	None	['Dubious open reading frame unlikely to encode a functional protein, based on available experimental and comparative sequence data']
24018	dnadiffSNV	chrXII	deletion	704461	704461	YLR279W	704309	704698	1	T	.	None	['Dubious open reading frame unlikely to encode a functional protein, based on available experimental and comparative sequence data']
24191	dnadiffSNV	chrXIII	deletion	380323	380324	YMR052C-A	380069	380434	-1	AA	.	None	['Dubious open reading frame unlikely to encode a functional protein, based on available experimental and comparative sequence data']
24214	dnadiffSNV	chrXIII	deletion	442250	442250	YMR086C-A	442026	442364	-1	T	.	None	['Dubious open reading frame unlikely to encode a functional protein, based on available experimental and comparative sequence data']
24296	dnadiffSNV	chrXIII	insertion	758843	758843	YMR245W	758563	759183	1	.	A	None	['Dubious open reading frame unlikely to encode a functional protein, based on available experimental and comparative sequence data']
24297	dnadiffSNV	chrXIII	deletion	758922	758923	YMR245W	758563	759183	1	TA	.	None	['Dubious open reading frame unlikely to encode a functional protein, based on available experimental and comparative sequence data']
24298	dnadiffSNV	chrXIII	deletion	758926	758927	YMR245W	758563	759183	1	TA	.	None	['Dubious open reading frame unlikely to encode a functional protein, based on available experimental and comparative sequence data']
24299	dnadiffSNV	chrXIII	insertion	759081	759081	YMR245W	758563	759183	1	.	G	None	['Dubious open reading frame unlikely to encode a functional protein, based on available experimental and comparative sequence data']
24300	dnadiffSNV	chrXIII	insertion	759082	759082	YMR245W	758563	759183	1	.	T	None	['Dubious open reading frame unlikely to encode a functional protein, based on available experimental and comparative sequence data']
24362	dnadiffSNV	chrXIII	deletion	886529	886530	YMR306C-A	886183	886572	-1	AA	.	None	['Dubious open reading frame unlikely to encode a functional protein, based on available experimental and comparative sequence data']
23604	dnadiffSNV	chrX	deletion	191588	191588	YJL119C	191572	191895	-1	A	.	None	['Dubious open reading frame unlikely to encode a functional protein, based on available experimental and comparative sequence data']
23685	dnadiffSNV	chrX	insertion	570609	570609	YJR071W	570405	570773	1	.	TT	None	['Dubious open reading frame unlikely to encode a functional protein, based on available experimental and comparative sequence data']
22367	dnadiffSNV	chrIV	deletion	770059	770059	YDR157W	769931	770332	1	C	.	None	['Dubious open reading frame unlikely to encode a functional protein, based on available experimental and comparative sequence data']
22467	dnadiffSNV	chrIV	deletion	1468518	1468518	YDR509W	1468226	1468573	1	A	.	None	['Dubious open reading frame unlikely to encode a functional protein, based on available experimental and comparative sequence data']
23452	dnadiffSNV	chrVIII	insertion	293085	293085	YHR095W	292943	293437	1	.	AA	None	['Dubious open reading frame unlikely to encode a functional protein, based on available experimental and comparative sequence data']
24442	dnadiffSNV	chrXIV	insertion	457148	457148	YNL089C	456693	457169	-1	.	A	None	['Dubious open reading frame unlikely to encode a functional protein; almost completely overlaps YNL090W/RHO2 which encodes a small GTPase of the Rho/Rac subfamily of Ras-like proteins']
24457	dnadiffSNV	chrXIV	insertion	631470	631470	YNR001W-A	631263	631481	1	.	A	None	['Dubious open reading frame unlikely to encode a functional protein; identified by homology']
22789	dnadiffSNV	chrV	insertion	42844	42844	YEL059W	42652	42960	1	.	TA	['HHY1', 'ENV6']	['Dubious open reading frame unlikely to encode a functional protein; mutant is hypersensitive to hygromycin B indicative of defects in vacuolar trafficking']
23960	dnadiffSNV	chrXII	insertion	423550	423550	YLR140W	423474	423800	1	.	T	None	['Dubious open reading frame unlikely to encode a functional protein; overlaps essential RRN5 gene which encodes a member of the UAF transcription factor involved in transcription of rDNA by RNA polymerase I']
22794	dnadiffSNV	chrV	insertion	69155	69155	YEL045C	68840	69265	-1	.	C	None	['Dubious open reading frame unlikely to encode a protein based on available experimental and comparative sequence data; deletion gives MMS sensitivity, growth defect under alkaline conditions, less than optimal growth upon citric acid stress']
22795	dnadiffSNV	chrV	insertion	69243	69243	YEL045C	68840	69265	-1	.	T	None	['Dubious open reading frame unlikely to encode a protein based on available experimental and comparative sequence data; deletion gives MMS sensitivity, growth defect under alkaline conditions, less than optimal growth upon citric acid stress']
22439	dnadiffSNV	chrIV	deletion	1108613	1108615	YDR320W-B	1108484	1108621	1	AAA	.	None	['Dubious open reading frame unlikely to encode a protein, based on available experimental and comparative sequence data; overlaps the verified gene DAD4/YDR320C-A']
23021	dnadiffSNV	chrVI	insertion	110110	110110	YFL012W-A	109810	110184	1	.	A	['YFL013W-A']	['Dubious open reading frame unlikely to encode a protein, based on available experimental and comparative sequence data; overlaps the verified gene IES1/YFL013C']
23022	dnadiffSNV	chrVI	deletion	110145	110145	YFL012W-A	109810	110184	1	A	.	['YFL013W-A']	['Dubious open reading frame unlikely to encode a protein, based on available experimental and comparative sequence data; overlaps the verified gene IES1/YFL013C']
22141	dnadiffSNV	chrIII	deletion	50598	50598	YCL041C	50133	50627	-1	A	.	None	['Dubious open reading frame unlikely to encode a protein, based on available experimental and comparative sequence data; partially overlaps both the verified gene PDI1/YCL043C and the uncharacterized gene YCL042W']
22705	dnadiffSNV	chrMito	insertion	51126	51126	Q0142	51052	51228	1	.	ACTATA	['ORF9']	['Dubious open reading frame unlikely to encode a protein, based on available experimental and comparative sequence data; partially overlaps dubious open reading frame Q0143']
24042	dnadiffSNV	chrXII	deletion	855747	855747	YLR366W	855538	855843	1	T	.	None	['Dubious open reading frame unlikely to encode a protein, based on available experimental and comparative sequence data; partially overlaps the dubious ORF YLR364C-A']
24116	dnadiffSNV	chrXIII	insertion	90860	90860	YML090W	90744	91130	1	.	TT	None	['Dubious open reading frame unlikely to encode a protein, based on available experimental and comparative sequence data; partially overlaps the dubious ORF YML089C; exhibits growth defect on a non-fermentable (respiratory) carbon source']
22915	dnadiffSNV	chrV	insertion	313516	313516	YER076W-A	313390	313737	1	.	TTGC	None	['Dubious open reading frame unlikely to encode a protein, based on available experimental and comparative sequence data; partially overlaps the uncharacterized ORF YER076C']
23779	dnadiffSNV	chrXI	deletion	518086	518086	YKR040C	518063	518566	-1	C	.	None	['Dubious open reading frame unlikely to encode a protein, based on available experimental and comparative sequence data; partially overlaps the uncharacterized ORF YKR041W']
23780	dnadiffSNV	chrXI	insertion	518102	518102	YKR040C	518063	518566	-1	.	T	None	['Dubious open reading frame unlikely to encode a protein, based on available experimental and comparative sequence data; partially overlaps the uncharacterized ORF YKR041W']
23781	dnadiffSNV	chrXI	deletion	518112	518112	YKR040C	518063	518566	-1	T	.	None	['Dubious open reading frame unlikely to encode a protein, based on available experimental and comparative sequence data; partially overlaps the uncharacterized ORF YKR041W']
23849	dnadiffSNV	chrXII	deletion	105628	105629	YLL020C	105556	105861	-1	AA	.	None	['Dubious open reading frame unlikely to encode a protein, based on available experimental and comparative sequence data; partially overlaps the verified gene KNS1']
23093	dnadiffSNV	chrVI	deletion	227477	227481	YFR036W-A	227451	228101	1	TCTTT	.	None	['Dubious open reading frame unlikely to encode a protein, based on available experimental and comparative sequence data; partially overlaps the verified gene RSC8']
23094	dnadiffSNV	chrVI	deletion	227500	227500	YFR036W-A	227451	228101	1	C	.	None	['Dubious open reading frame unlikely to encode a protein, based on available experimental and comparative sequence data; partially overlaps the verified gene RSC8']
24361	dnadiffSNV	chrXIII	insertion	878828	878828	YMR304C-A	878780	879130	-1	.	ATATATATATCTTTAT	None	['Dubious open reading frame unlikely to encode a protein, based on available experimental and comparative sequence data; partially overlaps the verified gene SCW10']
22125	dnadiffSNV	chrII	insertion	808739	808739	YBR300C	808600	809097	-1	.	T	None	['Dubious open reading frame unlikely to encode a protein, based on available experimental and comparative sequence data; partially overlaps the verified gene YBR301W; YBR300C is not an essential gene']
23339	dnadiffSNV	chrVII	deletion	1021973	1021974	YGR265W	1021648	1022058	1	TT	.	None	['Dubious open reading frame unlikely to encode a protein, based on available experimental and comparative sequence data; partially overlaps the verified ORF MES1/YGR264C, which encodes methionyl-tRNA synthetase']
23518	dnadiffSNV	chrX	deletion	85536	85537	YJL182C	85435	85752	-1	TT	.	None	['Dubious open reading frame unlikely to encode a protein, based on available experimental and comparative sequence data; partially overlaps uncharacterized ORF YJL181W']
23581	dnadiffSNV	chrX	deletion	147958	147958	YJL142C	147819	148211	-1	A	.	['IRC9']	['Dubious open reading frame unlikely to encode a protein, based on available experimental and comparative sequence data; partially overlaps verified gene YJL141C; null mutant displays increased levels of spontaneous Rad52p foci']
24194	dnadiffSNV	chrXIII	deletion	388699	388712	YMR057C	388359	388730	-1	TATATATATATATA	.	None	['Dubious open reading frame unlikely to encode a protein, based on available experimental and comparative sequence data; partially overlaps verified ORF AAC1']
21955	dnadiffSNV	chrII	insertion	105331	105331	YBL062W	105308	105688	1	.	T	None	['Dubious open reading frame unlikely to encode a protein, based on available experimental and comparative sequence data']
21956	dnadiffSNV	chrII	insertion	105348	105348	YBL062W	105308	105688	1	.	T	None	['Dubious open reading frame unlikely to encode a protein, based on available experimental and comparative sequence data']
24428	dnadiffSNV	chrXIV	insertion	357047	357047	YNL143C	356794	357186	-1	.	T	None	['Dubious open reading frame unlikely to encode a protein, based on available experimental and comparative sequence data']
24738	dnadiffSNV	chrXVI	deletion	502679	502681	YPL025C	502473	503030	-1	CAA	.	None	['Dubious open reading frame unlikely to encode a protein, based on available experimental and comparative sequence data']
23252	dnadiffSNV	chrVII	deletion	627181	627191	YGR069W	627083	627418	1	TATTTCTTTTT	.	None	['Dubious open reading frame unlikely to encode a protein, based on available experimental and comparative sequence data']
23253	dnadiffSNV	chrVII	deletion	627217	627217	YGR069W	627083	627418	1	C	.	None	['Dubious open reading frame unlikely to encode a protein, based on available experimental and comparative sequence data']
23299	dnadiffSNV	chrVII	deletion	702721	702722	YGR107W	702667	703116	1	TT	.	None	['Dubious open reading frame unlikely to encode a protein, based on available experimental and comparative sequence data']
22650	dnadiffSNV	chrMito	insertion	11823	11823	Q0032	11667	11957	1	.	TATTT	['ORF8']	['Dubious open reading frame unlikely to encode a protein, based on available experimental and comparative sequence data']
22651	dnadiffSNV	chrMito	deletion	11929	11932	Q0032	11667	11957	1	TTAA	.	['ORF8']	['Dubious open reading frame unlikely to encode a protein, based on available experimental and comparative sequence data']
22728	dnadiffSNV	chrMito	deletion	54306	54306	Q0144	54109	54438	1	T	.	None	['Dubious open reading frame unlikely to encode a protein, based on available experimental and comparative sequence data']
22729	dnadiffSNV	chrMito	deletion	54328	54330	Q0144	54109	54438	1	AAA	.	None	['Dubious open reading frame unlikely to encode a protein, based on available experimental and comparative sequence data']
22730	dnadiffSNV	chrMito	insertion	54364	54364	Q0144	54109	54438	1	.	TTTTAATATTA	None	['Dubious open reading frame unlikely to encode a protein, based on available experimental and comparative sequence data']
24621	dnadiffSNV	chrXV	deletion	720214	720214	YOR199W	720181	720510	1	A	.	None	['Dubious open reading frame unlikely to encode a protein, based on available experimental and comparative sequence data']
22594	dnadiffSNV	chrIX	deletion	292290	292290	YIL032C	291961	292317	-1	T	.	None	['Dubious open reading frame unlikely to encode a protein, based on available experimental and comparative sequence data']
23837	dnadiffSNV	chrXII	deletion	22740	22740	YLL059C	22474	22980	-1	C	.	None	['Dubious open reading frame unlikely to encode a protein, based on available experimental and comparative sequence data']
23838	dnadiffSNV	chrXII	deletion	22819	22826	YLL059C	22474	22980	-1	CATTTCTT	.	None	['Dubious open reading frame unlikely to encode a protein, based on available experimental and comparative sequence data']
24022	dnadiffSNV	chrXII	deletion	723180	723181	YLR296W	722978	723304	1	AA	.	None	['Dubious open reading frame unlikely to encode a protein, based on available experimental and comparative sequence data']
24025	dnadiffSNV	chrXII	deletion	757595	757595	YLR311C	757265	757612	-1	T	.	None	['Dubious open reading frame unlikely to encode a protein, based on available experimental and comparative sequence data']
24121	dnadiffSNV	chrXIII	deletion	99611	99616	YML084W	99489	99797	1	TATATA	.	None	['Dubious open reading frame unlikely to encode a protein, based on available experimental and comparative sequence data']
24321	dnadiffSNV	chrXIII	deletion	777671	777671	YMR254C	777615	777923	-1	A	.	None	['Dubious open reading frame unlikely to encode a protein, based on available experimental and comparative sequence data']
24322	dnadiffSNV	chrXIII	deletion	777922	777922	YMR254C	777615	777923	-1	A	.	None	['Dubious open reading frame unlikely to encode a protein, based on available experimental and comparative sequence data']
22126	dnadiffSNV	chrIII	deletion	1913	1913	YCL076W	1392	2135	1	A	.	None	['Dubious open reading frame unlikely to encode a protein, based on available experimental and comparative sequence data']
22165	dnadiffSNV	chrIII	deletion	212107	212122	YCR049C	211871	212317	-1	CTGAAGGAGTGGAGTC	.	None	['Dubious open reading frame unlikely to encode a protein, based on available experimental and comparative sequence data']
22166	dnadiffSNV	chrIII	deletion	212124	212125	YCR049C	211871	212317	-1	AC	.	None	['Dubious open reading frame unlikely to encode a protein, based on available experimental and comparative sequence data']
23568	dnadiffSNV	chrX	deletion	126729	126730	YJL156W-A	126604	126825	1	TT	.	None	['Dubious open reading frame unlikely to encode a protein, based on available experimental and comparative sequence data']
23569	dnadiffSNV	chrX	insertion	126814	126814	YJL156W-A	126604	126825	1	.	T	None	['Dubious open reading frame unlikely to encode a protein, based on available experimental and comparative sequence data']
22177	dnadiffSNV	chrIII	insertion	228234	228234	YCR064C	228095	228505	-1	.	A	None	['Dubious open reading frame unlikely to encode a protein, based on experimental and comparative sequence data; partially overlaps the verified gene BUD31']
24603	dnadiffSNV	chrXV	insertion	479448	479448	YOR082C	479296	479637	-1	.	AACAAAACAA	None	['Dubious open reading frame unlikely to encode a protein, based on experimental and comparative sequence data; partially overlaps the verified gene YOR083W']
23008	dnadiffSNV	chrVI	deletion	100386	100391	YFL019C	100252	100605	-1	CAGGTG	.	None	['Dubious open reading frame unlikely to encode a protein; YFL019C is not an essential gene']
22964	dnadiffSNV	chrV	deletion	400988	400988	YER119C-A	400867	401238	-1	C	.	None	['Dubious open reading frame, not conserved in closely related Saccharomyces species; deletion mutation blocks replication of Brome mosaic virus in S. cerevisiae, but this is likely due to effects on the overlapping gene SCS2']
22474	dnadiffSNV	chrIV	deletion	1490214	1490214	YDR525W	1489905	1490234	1	A	.	['API2']	['Dubious open reading frame, unlikely to encode a protein; not conserved in closely related Saccharomyces species; 26% of ORF overlaps the dubious ORF YDR524C-A; insertion mutation in a cdc34-2 mutant background causes altered bud morphology']
22361	dnadiffSNV	chrIV	insertion	727775	727775	YDR136C	727711	728283	-1	.	A	['VPS61']	['Dubious open reading frame, unlikely to encode a protein; not conserved in closely related Saccharomyces species; 4% of ORF overlaps the verified gene RGP1; deletion causes a vacuolar protein sorting defect']
24262	dnadiffSNV	chrXIII	insertion	562854	562854	YMR151W	562506	562943	1	.	T	['YIM2']	['Dubious open reading frame, unlikely to encode a protein; not conserved in closely related Saccharomyces species; 5% of ORF overlaps the verified gene IMP1']
24263	dnadiffSNV	chrXIII	deletion	562895	562895	YMR151W	562506	562943	1	T	.	['YIM2']	['Dubious open reading frame, unlikely to encode a protein; not conserved in closely related Saccharomyces species; 5% of ORF overlaps the verified gene IMP1']
23174	dnadiffSNV	chrVII	deletion	84292	84292	YGL218W	83650	84300	1	T	.	['SRF1']	['Dubious open reading frame, unlikely to encode a protein; not conserved in closely related Saccharomyces species; 93% of ORF overlaps the verified gene MDM34; deletion in cyr1 mutant results in loss of stress resistance']
24417	dnadiffSNV	chrXIV	deletion	300927	300929	YNL179C	300666	301103	-1	AGT	.	['SRF6']	['Dubious open reading frame, unlikely to encode a protein; not conserved in closely related Saccharomyces species; deletion in cyr1 mutant results in loss of stress resistance']
24418	dnadiffSNV	chrXIV	deletion	300949	300950	YNL179C	300666	301103	-1	AA	.	['SRF6']	['Dubious open reading frame, unlikely to encode a protein; not conserved in closely related Saccharomyces species; deletion in cyr1 mutant results in loss of stress resistance']
24419	dnadiffSNV	chrXIV	deletion	300960	300961	YNL179C	300666	301103	-1	AA	.	['SRF6']	['Dubious open reading frame, unlikely to encode a protein; not conserved in closely related Saccharomyces species; deletion in cyr1 mutant results in loss of stress resistance']
23446	dnadiffSNV	chrVIII	deletion	289304	289343	YHR093W	289142	289690	1	CCGGGGGGGGTGGGAAAAAAAAAGGGGTCAGAAAAAAAAA	.	['AHT1']	['Dubious open reading frame, unlikely to encode a protein; not conserved in closely related Saccharomyces species; multicopy suppressor of glucose transport defects, likely due to the presence of an HXT4 regulatory element in the region']
23447	dnadiffSNV	chrVIII	insertion	289444	289444	YHR093W	289142	289690	1	.	T	['AHT1']	['Dubious open reading frame, unlikely to encode a protein; not conserved in closely related Saccharomyces species; multicopy suppressor of glucose transport defects, likely due to the presence of an HXT4 regulatory element in the region']
23769	dnadiffSNV	chrXI	deletion	382548	382563	YKL030W	382498	383103	1	TGTATTATTATTATAT	.	None	['Dubious open reading frame, unlikely to encode a protein; not conserved in closely related Saccharomyces species; partially overlaps the verified gene MAE1']
23770	dnadiffSNV	chrXI	deletion	382569	382569	YKL030W	382498	383103	1	T	.	None	['Dubious open reading frame, unlikely to encode a protein; not conserved in closely related Saccharomyces species; partially overlaps the verified gene MAE1']
23771	dnadiffSNV	chrXI	deletion	382613	382613	YKL030W	382498	383103	1	T	.	None	['Dubious open reading frame, unlikely to encode a protein; not conserved in closely related Saccharomyces species; partially overlaps the verified gene MAE1']
23772	dnadiffSNV	chrXI	deletion	382688	382688	YKL030W	382498	383103	1	T	.	None	['Dubious open reading frame, unlikely to encode a protein; not conserved in closely related Saccharomyces species; partially overlaps the verified gene MAE1']
23694	dnadiffSNV	chrX	deletion	586430	586430	YJR087W	586400	586750	1	A	.	None	['Dubious open reading frame, unlikely to encode a protein; not conserved in closely related Saccharomyces species; partially overlaps the verified gene STE18 and uncharacterized ORF YJR088C']
23749	dnadiffSNV	chrXI	deletion	223174	223179	YKL115C	222893	223285	-1	CTAAAA	.	None	['Dubious open reading frame, unlikely to encode a protein; partially overlaps the verified gene PRR1']
22331	dnadiffSNV	chrIV	deletion	657677	657677	YDR102C	657648	657980	-1	C	.	None	['Dubious open reading frame; homozygous diploid deletion strain exhibits high budding index']
24562	dnadiffSNV	chrXV	deletion	356872	356872	YOR013W	356751	357221	1	T	.	['IRC11']	['Dubious opening reading frame unlikely to encode a protein, based on available experimental and comparative sequence data; partially overlaps the uncharacterized gene YOR012C; null mutant displays increased levels of spontaneous Rad52 foci']
22470	dnadiffSNV	chrIV	deletion	1483405	1483407	YDR521W	1483141	1483476	1	TTT	.	None	['Dubious ORF that overlaps YDR520C; mutant increases expression of PIS1 and RPL3 in glycerol']
23309	dnadiffSNV	chrVII	deletion	765786	765786	YGR139W	765726	766064	1	A	.	None	['Dubious ORF unlikely to encode a functional protein, based on available experimental and comparative sequence data']
23979	dnadiffSNV	chrXII	deletion	522268	522268	YLR184W	522106	522453	1	A	.	None	['Dubious ORF unlikely to encode a functional protein, based on available experimental and comparative sequence data']
23019	dnadiffSNV	chrVI	insertion	107808	107808	YFL013W-A	107799	108602	1	.	ATGTATGTATGT	None	['Dubious ORF unlikely to encode a protein, based on available experimental and comparative sequence data; partially overlaps IES1/YFL013C; identified by gene-trapping, microarray expression analysis, and genome-wide homology searching']
23020	dnadiffSNV	chrVI	insertion	107836	107836	YFL013W-A	107799	108602	1	.	GT	None	['Dubious ORF unlikely to encode a protein, based on available experimental and comparative sequence data; partially overlaps IES1/YFL013C; identified by gene-trapping, microarray expression analysis, and genome-wide homology searching']
23091	dnadiffSNV	chrVI	deletion	226131	226131	YFR034W-A	226022	226309	1	C	.	None	['Dubious ORF unlikely to encode a protein, based on available experimental and comparative sequence data; partially overlaps YFR035C; identified by gene-trapping, microarray expression analysis, and genome-wide homology searching']
22603	dnadiffSNV	chrIX	deletion	418511	418511	YIR033W	416124	419465	1	C	.	['MGA2']	['ER membrane protein involved in regulation of OLE1 transcription, acts with homolog Spt23p; inactive ER form dimerizes and one subunit is then activated by ubiquitin/proteasome-dependent processing followed by nuclear targeting']
22604	dnadiffSNV	chrIX	deletion	418540	418540	YIR033W	416124	419465	1	A	.	['MGA2']	['ER membrane protein involved in regulation of OLE1 transcription, acts with homolog Spt23p; inactive ER form dimerizes and one subunit is then activated by ubiquitin/proteasome-dependent processing followed by nuclear targeting']
22251	dnadiffSNV	chrIV	deletion	348731	348731	YDL058W	345665	351037	1	A	.	['USO1', 'INT1']	['Essential protein involved in the vesicle-mediated ER to Golgi transport step of secretion; binds membranes and functions during vesicle docking to the Golgi; required for assembly of the ER-to-Golgi SNARE complex']
22252	dnadiffSNV	chrIV	deletion	348751	348751	YDL058W	345665	351037	1	A	.	['USO1', 'INT1']	['Essential protein involved in the vesicle-mediated ER to Golgi transport step of secretion; binds membranes and functions during vesicle docking to the Golgi; required for assembly of the ER-to-Golgi SNARE complex']
23695	dnadiffSNV	chrX	deletion	594203	594214	YJR090C	590872	594327	-1	TTGTTGTTGTTG	.	['GRR1', 'CAT80', 'COT2', 'SDC1', 'SSU2']	['F-box protein component of the SCF ubiquitin-ligase complex; involved in carbon catabolite repression, glucose-dependent divalent cation transport, high-affinity glucose transport, morphogenesis, and sulfite detoxification']
22494	dnadiffSNV	chrIV	deletion	1512957	1512957	YDR539W	1512094	1513605	1	A	.	['FDC1']	['Ferulic acid decarboxylase, essential for decarboxylation of phenylacrylic acids; homolog of E. coli UbiD; green fluorescent protein (GFP)-fusion protein localizes to the cytoplasm']
24387	dnadiffSNV	chrXIV	insertion	131659	131659	YNL271C	129522	135383	-1	.	GAGGAGGAG	['BNI1', 'PPF3', 'SHE5']	['Formin, nucleates the formation of linear actin filaments, involved in cell processes such as budding and mitotic spindle orientation which require the formation of polarized actin cables, functionally redundant with BNR1']
24046	dnadiffSNV	chrXII	insertion	863719	863719	YLR371W	862714	866784	1	.	ATCATCATC	['ROM2']	['GDP/GTP exchange protein (GEP) for Rho1p and Rho2p; mutations are synthetically lethal with mutations in rom1, which also encodes a GEP']
22191	dnadiffSNV	chrIII	insertion	262153	262153	YCR084C	260311	262452	-1	.	TGCTGTTGCTGTTG	['TUP1', 'AAR1', 'AER2', 'AMM1', 'CRT4', 'CYC9', 'FLK1', 'ROX4', 'SFL2', 'UMR7']	['General repressor of transcription, forms complex with Cyc8p, involved in the establishment of repressive chromatin structure through interactions with histones H3 and H4, appears to enhance expression of some genes']
22192	dnadiffSNV	chrIII	insertion	262154	262154	YCR084C	260311	262452	-1	.	T	['TUP1', 'AAR1', 'AER2', 'AMM1', 'CRT4', 'CYC9', 'FLK1', 'ROX4', 'SFL2', 'UMR7']	['General repressor of transcription, forms complex with Cyc8p, involved in the establishment of repressive chromatin structure through interactions with histones H3 and H4, appears to enhance expression of some genes']
22003	dnadiffSNV	chrII	deletion	205777	205779	YBL011W	203538	205817	1	AAG	.	['SCT1', 'GAT2']	['Glycerol 3-phosphate/dihydroxyacetone phosphate dual substrate-specific sn-1 acyltransferase of the glycerolipid biosynthesis pathway, prefers 16-carbon fatty acids, similar to Gpt2p, gene is constitutively transcribed']
24513	dnadiffSNV	chrXV	insertion	178084	178084	YOL081W	171070	180309	1	.	A	['IRA2', 'CCS1', 'GLC4']	['GTPase-activating protein that negatively regulates RAS by converting it from the GTP- to the GDP-bound inactive form, required for reducing cAMP levels under nutrient limiting conditions, has similarity to Ira1p and human neurofibromin']
22377	dnadiffSNV	chrIV	deletion	801704	801718	YDR170C	796193	802222	-1	TTCTTCTTCTTCTTC	.	['SEC7']	['Guanine nucleotide exchange factor (GEF) for ADP ribosylation factors involved in proliferation of the Golgi, intra-Golgi transport and ER-to-Golgi transport; found in the cytoplasm and on Golgi-associated coated vesicles']
22378	dnadiffSNV	chrIV	deletion	801938	801943	YDR170C	796193	802222	-1	TCCATC	.	['SEC7']	['Guanine nucleotide exchange factor (GEF) for ADP ribosylation factors involved in proliferation of the Golgi, intra-Golgi transport and ER-to-Golgi transport; found in the cytoplasm and on Golgi-associated coated vesicles']
24066	dnadiffSNV	chrXII	deletion	986064	986064	YLR425W	982894	986817	1	G	.	['TUS1', 'SOP10']	['Guanine nucleotide exchange factor (GEF) that functions to modulate Rho1p activity as part of the cell integrity signaling pathway; multicopy suppressor of tor2 mutation and ypk1 ypk2 double mutation; potential Cdc28p substrate']
23196	dnadiffSNV	chrVII	deletion	142038	142039	YGL193C	141916	142227	-1	TT	.	None	['Haploid-specific gene repressed by a1-alpha2, turned off in sir3 null strains, absence enhances the sensitivity of rad52-327 cells to campothecin almost 100-fold']
22053	dnadiffSNV	chrII	insertion	374876	374876	YBR068C	373861	375690	-1	.	GG	['BAP2']	['High-affinity leucine permease, functions as a branched-chain amino acid permease involved in the uptake of leucine, isoleucine and valine; contains 12 predicted transmembrane domains']
23142	dnadiffSNV	chrVII	deletion	21518	21523	YGL255W	20978	22108	1	AATGAC	.	['ZRT1']	['High-affinity zinc transporter of the plasma membrane, responsible for the majority of zinc uptake; transcription is induced under low-zinc conditions by the Zap1p transcription factor']
23143	dnadiffSNV	chrVII	insertion	21891	21891	YGL255W	20978	22108	1	.	A	['ZRT1']	['High-affinity zinc transporter of the plasma membrane, responsible for the majority of zinc uptake; transcription is induced under low-zinc conditions by the Zap1p transcription factor']
23144	dnadiffSNV	chrVII	deletion	21894	21894	YGL255W	20978	22108	1	G	.	['ZRT1']	['High-affinity zinc transporter of the plasma membrane, responsible for the majority of zinc uptake; transcription is induced under low-zinc conditions by the Zap1p transcription factor']
22236	dnadiffSNV	chrIV	deletion	271823	271825	YDL106C	270222	271901	-1	GTT	.	['PHO2', 'BAS2', 'GRF10', 'phoB']	['Homeobox transcription factor; regulatory targets include genes involved in phosphate metabolism; binds cooperatively with Pho4p to the PHO5 promoter; phosphorylation of Pho2p facilitates interaction with Pho4p']
23652	dnadiffSNV	chrX	insertion	519693	519693	YJR045C	519638	521602	-1	.	TGT	['SSC1', 'ENS1', 'mtHSP70']	['Hsp70 family ATPase, constituent of the import motor component of the Translocase of the Inner Mitochondrial membrane (TIM23 complex); involved in protein translocation and folding; subunit of SceI endonuclease']
22384	dnadiffSNV	chrIV	deletion	810749	810751	YDR173C	810565	811632	-1	TCA	.	['ARG82', 'ARGR3', 'ARGRIII', 'IPK2']	['Inositol polyphosphate multikinase (IPMK), sequentially phosphorylates Ins(1,4,5)P3 to form Ins(1,3,4,5,6)P5; also has diphosphoinositol polyphosphate synthase activity; regulates arginine-, phosphate-, and nitrogen-responsive genes']
22385	dnadiffSNV	chrIV	insertion	810760	810760	YDR173C	810565	811632	-1	.	TTATCATCA	['ARG82', 'ARGR3', 'ARGRIII', 'IPK2']	['Inositol polyphosphate multikinase (IPMK), sequentially phosphorylates Ins(1,4,5)P3 to form Ins(1,3,4,5,6)P5; also has diphosphoinositol polyphosphate synthase activity; regulates arginine-, phosphate-, and nitrogen-responsive genes']
22181	dnadiffSNV	chrIII	insertion	233835	233835	YCR067C	233125	236322	-1	.	GGGTTCCGAATTGTCAGCCAACACACTGGT	['SED4']	['Integral endoplasmic reticulum membrane protein that stimulates Sar1p GTPase activity; involved in COPII vesicle budding through disassociation of coat proteins from membranes onto liposomes; binds Sec16p; similar to Sec12p']
22182	dnadiffSNV	chrIII	insertion	234925	234925	YCR067C	233125	236322	-1	.	GAAGAAGAATAAGTAGAAGAAGAAGAA	['SED4']	['Integral endoplasmic reticulum membrane protein that stimulates Sar1p GTPase activity; involved in COPII vesicle budding through disassociation of coat proteins from membranes onto liposomes; binds Sec16p; similar to Sec12p']
24206	dnadiffSNV	chrXIII	insertion	411265	411265	YMR071C	410762	411265	-1	.	TT	['TVP18']	['Integral membrane protein localized to late Golgi vesicles along with the v-SNARE Tlg2p; may interact with ribosomes, based on co-purification experiments']
22050	dnadiffSNV	chrII	deletion	316969	316969	YBR040W	316968	317864	1	T	.	['FIG1']	['Integral membrane protein required for efficient mating; may participate in or regulate the low affinity Ca2+ influx system, which affects intracellular signaling and cell-cell fusion during mating']
24423	dnadiffSNV	chrXIV	deletion	312334	312336	YNL172W	310636	315882	1	GAC	.	['APC1']	['Largest subunit of the Anaphase-Promoting Complex/Cyclosome (APC/C), which is a ubiquitin-protein ligase required for degradation of anaphase inhibitors, including mitotic cyclins, during the metaphase/anaphase transition']
24134	dnadiffSNV	chrXIII	deletion	143063	143068	YML065W	142210	144954	1	AAGAAG	.	['ORC1']	['Largest subunit of the origin recognition complex, which directs DNA replication by binding to replication origins and is also involved in transcriptional silencing; exhibits ATPase activity']
24135	dnadiffSNV	chrXIII	insertion	143095	143095	YML065W	142210	144954	1	.	AAGACGAAGACGAAGAAG	['ORC1']	['Largest subunit of the origin recognition complex, which directs DNA replication by binding to replication origins and is also involved in transcriptional silencing; exhibits ATPase activity']
23448	dnadiffSNV	chrVIII	deletion	291330	291330	YHR094C	290913	292625	-1	G	.	['HXT1', 'HOR4']	['Low-affinity glucose transporter of the major facilitator superfamily, expression is induced by Hxk2p in the presence of glucose and repressed by Rgt1p when glucose is limiting']
23449	dnadiffSNV	chrVIII	insertion	291336	291336	YHR094C	290913	292625	-1	.	G	['HXT1', 'HOR4']	['Low-affinity glucose transporter of the major facilitator superfamily, expression is induced by Hxk2p in the presence of glucose and repressed by Rgt1p when glucose is limiting']
23450	dnadiffSNV	chrVIII	insertion	291365	291365	YHR094C	290913	292625	-1	.	G	['HXT1', 'HOR4']	['Low-affinity glucose transporter of the major facilitator superfamily, expression is induced by Hxk2p in the presence of glucose and repressed by Rgt1p when glucose is limiting']
23451	dnadiffSNV	chrVIII	deletion	291372	291372	YHR094C	290913	292625	-1	A	.	['HXT1', 'HOR4']	['Low-affinity glucose transporter of the major facilitator superfamily, expression is induced by Hxk2p in the presence of glucose and repressed by Rgt1p when glucose is limiting']
24393	dnadiffSNV	chrXIV	insertion	138550	138550	YNL268W	138550	140385	1	.	TA	['LYP1']	['Lysine permease; one of three amino acid permeases (Alp1p, Can1p, Lyp1p) responsible for uptake of cationic amino acids']
23972	dnadiffSNV	chrXII	deletion	510210	510210	YLR176C	507797	510232	-1	T	.	['RFX1', 'CRT1']	['Major transcriptional repressor of DNA-damage-regulated genes, recruits repressors Tup1p and Cyc8p to their promoters; involved in DNA damage and replication checkpoint pathway; similar to a family of mammalian DNA binding RFX1-4 proteins']
22484	dnadiffSNV	chrIV	insertion	1503843	1503843	YDR534C	1503314	1504900	-1	.	AAA	['FIT1']	['Mannoprotein that is incorporated into the cell wall via a glycosylphosphatidylinositol (GPI) anchor, involved in the retention of siderophore-iron in the cell wall']
22485	dnadiffSNV	chrIV	deletion	1503947	1503963	YDR534C	1503314	1504900	-1	GGAAGTCTCAACAGCAG	.	['FIT1']	['Mannoprotein that is incorporated into the cell wall via a glycosylphosphatidylinositol (GPI) anchor, involved in the retention of siderophore-iron in the cell wall']
22486	dnadiffSNV	chrIV	deletion	1503965	1503965	YDR534C	1503314	1504900	-1	G	.	['FIT1']	['Mannoprotein that is incorporated into the cell wall via a glycosylphosphatidylinositol (GPI) anchor, involved in the retention of siderophore-iron in the cell wall']
23563	dnadiffSNV	chrX	insertion	122616	122616	YJL158C	122265	122948	-1	.	GAT	['CIS3', 'CCW11', 'CCW5', 'PIR4']	['Mannose-containing glycoprotein constituent of the cell wall; member of the PIR (proteins with internal repeats) family']
23564	dnadiffSNV	chrX	deletion	122694	122699	YJL158C	122265	122948	-1	GGCTTG	.	['CIS3', 'CCW11', 'CCW5', 'PIR4']	['Mannose-containing glycoprotein constituent of the cell wall; member of the PIR (proteins with internal repeats) family']
23565	dnadiffSNV	chrX	deletion	122703	122705	YJL158C	122265	122948	-1	AGT	.	['CIS3', 'CCW11', 'CCW5', 'PIR4']	['Mannose-containing glycoprotein constituent of the cell wall; member of the PIR (proteins with internal repeats) family']
23372	dnadiffSNV	chrVIII	deletion	63937	63937	YHL022C	62961	64157	-1	T	.	['SPO11']	['Meiosis-specific protein that initiates meiotic recombination by catalyzing the formation of double-strand breaks in DNA via a transesterification reaction; required for homologous chromosome pairing and synaptonemal complex formation']
23000	dnadiffSNV	chrVI	deletion	11665	11665	YFL059W	11363	12259	1	T	.	['SNZ3']	['Member of a stationary phase-induced gene family; transcription of SNZ2 is induced prior to diauxic shift, and also in the absence of thiamin in a Thi2p-dependent manner; forms a coregulated gene pair with SNO3']
23721	dnadiffSNV	chrXI	insertion	48914	48914	YKL207W	48194	48955	1	.	TGTC	['AIM27', 'EMC3', 'LRC3']	['Member of a transmembrane complex required for efficient folding of proteins in the ER; required for respiratory growth; null mutant displays induction of the unfolded protein response']
22113	dnadiffSNV	chrII	deletion	711395	711396	YBR245C	708150	711539	-1	TT	.	['ISW1', 'SGN2']	['Member of the imitation-switch (ISWI) class of ATP-dependent chromatin remodeling complexes; ATPase that forms a complex with Ioc2p and Ioc4p to regulate transcription elongation, and a complex with Ioc3p to repress transcription initiation']
23994	dnadiffSNV	chrXII	deletion	666045	666071	YLR260W	665844	667907	1	ATCAGTAGAACTAGCTTTCAAAGCAAC	.	['LCB5']	['Minor sphingoid long-chain base kinase, paralog of Lcb4p responsible for few percent of the total activity, possibly involved in synthesis of long-chain base phosphates, which function as signaling molecules']
23789	dnadiffSNV	chrXI	insertion	567125	567125	YKR066C	566113	567198	-1	.	CAG	['CCP1']	['Mitochondrial cytochrome-c peroxidase; degrades reactive oxygen species in mitochondria, involved in the response to oxidative stress']
23790	dnadiffSNV	chrXI	insertion	567169	567169	YKR066C	566113	567198	-1	.	A	['CCP1']	['Mitochondrial cytochrome-c peroxidase; degrades reactive oxygen species in mitochondria, involved in the response to oxidative stress']
23791	dnadiffSNV	chrXI	insertion	567183	567183	YKR066C	566113	567198	-1	.	A	['CCP1']	['Mitochondrial cytochrome-c peroxidase; degrades reactive oxygen species in mitochondria, involved in the response to oxidative stress']
23964	dnadiffSNV	chrXII	insertion	494378	494378	YLR164W	493883	494389	1	.	A	None	['Mitochondrial inner membrane of unknown function; similar to Tim18p and Sdh4p; expression induced by nitrogen limitation in a GLN3, GAT1-dependent manner']
23332	dnadiffSNV	chrVII	insertion	1006276	1006276	YGR257C	1006205	1007305	-1	.	C	['MTM1']	['Mitochondrial protein of the mitochondrial carrier family, involved in activating mitochondrial Sod2p probably by facilitating insertion of an essential manganese cofactor']
23333	dnadiffSNV	chrVII	deletion	1006279	1006279	YGR257C	1006205	1007305	-1	G	.	['MTM1']	['Mitochondrial protein of the mitochondrial carrier family, involved in activating mitochondrial Sod2p probably by facilitating insertion of an essential manganese cofactor']
22701	dnadiffSNV	chrMito	insertion	49379	49379	Q0140	48901	50097	1	.	TAATAA	['VAR1', 'VARI']	['Mitochondrial ribosomal protein of the small subunit, mitochondrially-encoded; polymorphic in different strains due to variation in number of AAT (asparagine) codons; translated near the mitochondrial inner membrane']
22702	dnadiffSNV	chrMito	insertion	49752	49752	Q0140	48901	50097	1	.	AATAATAATAATAATAAT	['VAR1', 'VARI']	['Mitochondrial ribosomal protein of the small subunit, mitochondrially-encoded; polymorphic in different strains due to variation in number of AAT (asparagine) codons; translated near the mitochondrial inner membrane']
24324	dnadiffSNV	chrXIII	insertion	779641	779641	YMR257C	779629	782031	-1	.	TCC	['PET111']	['Mitochondrial translational activator specific for the COX2 mRNA; located in the mitochondrial inner membrane']
22263	dnadiffSNV	chrIV	deletion	388729	388729	YDL036C	387513	388901	-1	T	.	['PUS9']	['Mitochondrial tRNA:pseudouridine synthase, catalyzes the formation of pseudouridine at position 32 in mitochondrial tRNAs; contains an N-terminal mitochondrial targeting sequence']
24376	dnadiffSNV	chrXIV	deletion	84903	84904	YNL291C	84169	85815	-1	TT	.	['MID1']	['N-glycosylated integral membrane protein of the ER membrane and plasma membrane, functions as a stretch-activated Ca2+-permeable cation channel required for Ca2+ influx stimulated by pheromone; interacts with Cch1p; forms an oligomer']
23799	dnadiffSNV	chrXI	deletion	576491	576502	YKR072C	576435	578123	-1	CATCGTCGTCGT	.	['SIS2', 'HAL3']	['Negative regulatory subunit of protein phosphatase 1 Ppz1p and also a subunit of the phosphopantothenoylcysteine decarboxylase (PPCDC; Cab3p, Sis2p, Vhs3p) complex, which catalyzes the third step of coenzyme A biosynthesis']
24203	dnadiffSNV	chrXIII	insertion	409535	409535	YMR070W	409154	410626	1	.	ACAACAGCA	['MOT3', 'ROX7']	['Nuclear transcription factor with two Cys2-His2 zinc fingers; involved in repression of a subset of hypoxic genes by Rox1p, repression of several DAN/TIR genes during aerobic growth, and repression of ergosterol biosynthetic genes']
24204	dnadiffSNV	chrXIII	deletion	409881	409886	YMR070W	409154	410626	1	ACCATC	.	['MOT3', 'ROX7']	['Nuclear transcription factor with two Cys2-His2 zinc fingers; involved in repression of a subset of hypoxic genes by Rox1p, repression of several DAN/TIR genes during aerobic growth, and repression of ergosterol biosynthetic genes']
24205	dnadiffSNV	chrXIII	deletion	410429	410431	YMR070W	409154	410626	1	AAT	.	['MOT3', 'ROX7']	['Nuclear transcription factor with two Cys2-His2 zinc fingers; involved in repression of a subset of hypoxic genes by Rox1p, repression of several DAN/TIR genes during aerobic growth, and repression of ergosterol biosynthetic genes']
23872	dnadiffSNV	chrXII	deletion	132252	132263	YLL008W	131729	133987	1	AGGAGGAAAAGG	.	['DRS1']	['Nucleolar DEAD-box protein required for ribosome assembly and function, including synthesis of 60S ribosomal subunits; constituent of 66S pre-ribosomal particles']
24124	dnadiffSNV	chrXIII	insertion	120626	120626	YML074C	120089	121324	-1	.	TCT	['FPR3', 'NPI46']	['Nucleolar peptidyl-prolyl cis-trans isomerase (PPIase); FK506 binding protein; phosphorylated by casein kinase II (Cka1p-Cka2p-Ckb1p-Ckb2p) and dephosphorylated by Ptp1p']
24335	dnadiffSNV	chrXIII	deletion	804943	804945	YMR269W	804456	805091	1	AGA	.	['TMA23', 'YMR268W-A']	['Nucleolar protein of unknown function implicated in ribosome biogenesis; TMA23 may be a fungal-specific gene as no homologs have been yet identified in higher eukaryotes']
23805	dnadiffSNV	chrXI	insertion	613092	613092	YKR092C	612665	613885	-1	.	AAG	['SRP40']	['Nucleolar, serine-rich protein with a role in preribosome assembly or transport; may function as a chaperone of small nucleolar ribonucleoprotein particles (snoRNPs); immunologically and structurally to rat Nopp140']
23806	dnadiffSNV	chrXI	deletion	613649	613650	YKR092C	612665	613885	-1	TG	.	['SRP40']	['Nucleolar, serine-rich protein with a role in preribosome assembly or transport; may function as a chaperone of small nucleolar ribonucleoprotein particles (snoRNPs); immunologically and structurally to rat Nopp140']
23807	dnadiffSNV	chrXI	deletion	613652	613652	YKR092C	612665	613885	-1	T	.	['SRP40']	['Nucleolar, serine-rich protein with a role in preribosome assembly or transport; may function as a chaperone of small nucleolar ribonucleoprotein particles (snoRNPs); immunologically and structurally to rat Nopp140']
23808	dnadiffSNV	chrXI	insertion	613697	613697	YKR092C	612665	613885	-1	.	TCA	['SRP40']	['Nucleolar, serine-rich protein with a role in preribosome assembly or transport; may function as a chaperone of small nucleolar ribonucleoprotein particles (snoRNPs); immunologically and structurally to rat Nopp140']
23809	dnadiffSNV	chrXI	insertion	613703	613703	YKR092C	612665	613885	-1	.	TCA	['SRP40']	['Nucleolar, serine-rich protein with a role in preribosome assembly or transport; may function as a chaperone of small nucleolar ribonucleoprotein particles (snoRNPs); immunologically and structurally to rat Nopp140']
23810	dnadiffSNV	chrXI	insertion	613785	613785	YKR092C	612665	613885	-1	.	ACG	['SRP40']	['Nucleolar, serine-rich protein with a role in preribosome assembly or transport; may function as a chaperone of small nucleolar ribonucleoprotein particles (snoRNPs); immunologically and structurally to rat Nopp140']
23560	dnadiffSNV	chrX	deletion	121164	121220	YJL159W	120449	121690	1	CTACTACCAAGACTACCGCTGCTGCTGTCTCTCAAATCGGTGATGGTCAAGTTCAAG	.	['HSP150', 'CCW7', 'ORE1', 'PIR2']	['O-mannosylated heat shock protein that is secreted and covalently attached to the cell wall via beta-1,3-glucan and disulfide bridges; required for cell wall stability; induced by heat shock, oxidative stress, and nitrogen limitation']
23801	dnadiffSNV	chrXI	deletion	582489	582489	YKR076W	582283	583395	1	A	.	['ECM4', 'GTO2']	['Omega class glutathione transferase; not essential; similar to Ygr154cp; green fluorescent protein (GFP)-fusion protein localizes to the cytoplasm']
23802	dnadiffSNV	chrXI	insertion	582494	582494	YKR076W	582283	583395	1	.	AC	['ECM4', 'GTO2']	['Omega class glutathione transferase; not essential; similar to Ygr154cp; green fluorescent protein (GFP)-fusion protein localizes to the cytoplasm']
22065	dnadiffSNV	chrII	deletion	485940	485940	YBR123C	484742	486691	-1	T	.	['TFC1']	['One of six subunits of the RNA polymerase III transcription initiation factor complex (TFIIIC); part of the TauA globular domain of TFIIIC that binds DNA at the BoxA promoter sites of tRNA and similar genes; human homolog is TFIIIC-63']
21925	dnadiffSNV	chrI	deletion	190322	190322	YAR035W	190193	192256	1	A	.	['YAT1']	['Outer mitochondrial carnitine acetyltransferase, minor ethanol-inducible enzyme involved in transport of activated acyl groups from the cytoplasm into the mitochondrial matrix; phosphorylated']
21926	dnadiffSNV	chrI	insertion	190339	190339	YAR035W	190193	192256	1	.	A	['YAT1']	['Outer mitochondrial carnitine acetyltransferase, minor ethanol-inducible enzyme involved in transport of activated acyl groups from the cytoplasm into the mitochondrial matrix; phosphorylated']
21927	dnadiffSNV	chrI	insertion	191368	191368	YAR035W	190193	192256	1	.	TCG	['YAT1']	['Outer mitochondrial carnitine acetyltransferase, minor ethanol-inducible enzyme involved in transport of activated acyl groups from the cytoplasm into the mitochondrial matrix; phosphorylated']
24539	dnadiffSNV	chrXV	deletion	307255	307266	YOL011W	305349	307409	1	CATCGTCTTCAT	.	['PLB3']	['Phospholipase B (lysophospholipase) involved in phospholipid metabolism; hydrolyzes phosphatidylinositol and phosphatidylserine and displays transacylase activity in vitro']
22913	dnadiffSNV	chrV	insertion	309019	309019	YER075C	308413	311199	-1	.	TCG	['PTP3']	['Phosphotyrosine-specific protein phosphatase involved in the inactivation of mitogen-activated protein kinase (MAPK) during osmolarity sensing; dephosporylates Hog1p MAPK and regulates its localization; localized to the cytoplasm']
23865	dnadiffSNV	chrXII	deletion	130082	130087	YLL010C	129330	130613	-1	GCGACT	.	['PSR1']	['Plasma membrane associated protein phosphatase involved in the general stress response; required along with binding partner Whi2p for full activation of STRE-mediated gene expression, possibly through dephosphorylation of Msn2p']
23866	dnadiffSNV	chrXII	insertion	130105	130105	YLL010C	129330	130613	-1	.	GTGACTGTGACTGTGACT	['PSR1']	['Plasma membrane associated protein phosphatase involved in the general stress response; required along with binding partner Whi2p for full activation of STRE-mediated gene expression, possibly through dephosphorylation of Msn2p']
23867	dnadiffSNV	chrXII	insertion	130122	130122	YLL010C	129330	130613	-1	.	TGTGAC	['PSR1']	['Plasma membrane associated protein phosphatase involved in the general stress response; required along with binding partner Whi2p for full activation of STRE-mediated gene expression, possibly through dephosphorylation of Msn2p']
22160	dnadiffSNV	chrIII	insertion	181454	181454	YCR032W	179520	186023	1	.	TA	['BPH1']	['PProtein homologous to human Chediak-Higashi syndrome and murine Beige proteins, which are implicated in disease syndromes due to defective lysosomal trafficking; mutant phenotype and genetic interactions suggest a role in protein sorting']
22798	dnadiffSNV	chrV	deletion	71358	71358	YEL043W	70478	73348	1	A	.	None	['Predicted cytoskeleton protein involved in intracellular signalling based on quantitative analysis of protein-protein interaction maps; may interact with ribosomes, based on co-purification studies; contains fibronectin type III domain fold']
22799	dnadiffSNV	chrV	deletion	71392	71392	YEL043W	70478	73348	1	A	.	None	['Predicted cytoskeleton protein involved in intracellular signalling based on quantitative analysis of protein-protein interaction maps; may interact with ribosomes, based on co-purification studies; contains fibronectin type III domain fold']
22808	dnadiffSNV	chrV	deletion	86487	86487	YEL033W	86179	86598	1	T	.	['MTC7']	['Predicted metabolic role based on network analysis derived from ChIP experiments, a large-scale deletion study and localization of transcription factor binding sites; null mutant is sensitive to temperature oscillation in a cdc13-1 mutant']
24711	dnadiffSNV	chrXVI	insertion	189549	189549	YPL189W	189154	190983	1	.	T	['GUP2']	['Probable membrane protein with a possible role in proton symport of glycerol; member of the MBOAT family of putative membrane-bound O-acyltransferases; Gup1p homolog']
24712	dnadiffSNV	chrXVI	deletion	189562	189562	YPL189W	189154	190983	1	T	.	['GUP2']	['Probable membrane protein with a possible role in proton symport of glycerol; member of the MBOAT family of putative membrane-bound O-acyltransferases; Gup1p homolog']
23187	dnadiffSNV	chrVII	insertion	112947	112947	YGL203C	112475	114664	-1	.	CGTCGTCGTCGTCGTCATCGTCGT	['KEX1']	['Protease involved in the processing of killer toxin and alpha factor precursor; cleaves Lys and Arg residues from the C-terminus of peptides and proteins']
22119	dnadiffSNV	chrII	deletion	746373	746379	YBR272C	746361	747803	-1	TGCAATC	.	['HSM3']	['Proteasome-interacting protein involved in the assembly of the base subcomplex of the 19S proteasomal regulatory particle (RP); involved in DNA mismatch repair during slow growth; weak similarity to Msh1p; related to human 19S subunit S5b']
24001	dnadiffSNV	chrXII	insertion	673334	673334	YLR264W	673131	673334	1	.	A	['RPS28B', 'RPS33B']	['Protein component of the small (40S) ribosomal subunit; nearly identical to Rps28Ap and has similarity to rat S28 ribosomal protein']
22366	dnadiffSNV	chrIV	insertion	766999	766999	YDR153C	766736	767971	-1	.	ATC	['ENT5']	['Protein containing an N-terminal epsin-like domain involved in clathrin recruitment and traffic between the Golgi and endosomes; associates with the clathrin adaptor Gga2p, clathrin adaptor complex AP-1, and clathrin']
24251	dnadiffSNV	chrXIII	insertion	541443	541443	YMR136W	541199	542881	1	.	CAACAACAACAACAACAA	['GAT2']	['Protein containing GATA family zinc finger motifs; similar to Gln3p and Dal80p; expression repressed by leucine']
24038	dnadiffSNV	chrXII	deletion	835613	835615	YLR353W	834352	836163	1	AGA	.	['BUD8']	['Protein involved in bud-site selection; diploid mutants display a unipolar budding pattern instead of the wild-type bipolar pattern, and bud at the proximal pole']
23189	dnadiffSNV	chrVII	deletion	118314	118322	YGL201C	117854	120907	-1	TCATCATTG	.	['MCM6']	['Protein involved in DNA replication; component of the Mcm2-7 hexameric complex that binds chromatin as a part of the pre-replicative complex']
23047	dnadiffSNV	chrVI	deletion	160596	160598	YFR008W	160535	161200	1	AGC	.	['FAR7']	['Protein involved in recovery from cell cycle arrest in response to pheromone, in a Far1p-independent pathway; interacts with Far3p, Far8p, Far9p, Far10p, and Far11p']
23511	dnadiffSNV	chrX	insertion	78980	78980	YJL187C	76803	79262	-1	.	TTCCTCTT	['SWE1', 'WEE1']	['Protein kinase that regulates the G2/M transition by inhibition of Cdc28p kinase activity; localizes to the nucleus and to the daughter side of the mother-bud neck; homolog of S. pombe Wee1p; potential Cdc28p substrate']
23512	dnadiffSNV	chrX	insertion	78981	78981	YJL187C	76803	79262	-1	.	T	['SWE1', 'WEE1']	['Protein kinase that regulates the G2/M transition by inhibition of Cdc28p kinase activity; localizes to the nucleus and to the daughter side of the mother-bud neck; homolog of S. pombe Wee1p; potential Cdc28p substrate']
24645	dnadiffSNV	chrXV	deletion	875976	875977	YOR298W	875599	877038	1	AA	.	['MUM3']	['Protein of unknown function involved in the organization of the outer spore wall layers; has similarity to the tafazzins superfamily of acyltransferases']
24646	dnadiffSNV	chrXV	insertion	875981	875981	YOR298W	875599	877038	1	.	A	['MUM3']	['Protein of unknown function involved in the organization of the outer spore wall layers; has similarity to the tafazzins superfamily of acyltransferases']
23409	dnadiffSNV	chrVIII	insertion	144527	144527	YHR020W	143996	146062	1	.	CAGCAGCAGCAG	None	['Protein of unknown function that may interact with ribosomes, based on co-purification experiments; has similarity to proline-tRNA ligase; YHR020W is an essential gene']
23716	dnadiffSNV	chrXI	deletion	5597	5597	YKL222C	3503	5620	-1	T	.	None	['Protein of unknown function that may interact with ribosomes, based on co-purification experiments; similar to transcriptional regulators from the zinc cluster (binuclear cluster) family; null mutant is sensitive to caffeine']
23601	dnadiffSNV	chrX	deletion	189029	189031	YJL123C	188004	189440	-1	CCT	.	['MTC1']	['Protein of unknown function that may interact with ribosomes; green fluorescent protein (GFP)-fusion protein localizes to the cytoplasm and to COPI-coated vesicles (early Golgi); mtc1 is synthetically lethal with cdc13-1']
23602	dnadiffSNV	chrX	insertion	189050	189050	YJL123C	188004	189440	-1	.	TT	['MTC1']	['Protein of unknown function that may interact with ribosomes; green fluorescent protein (GFP)-fusion protein localizes to the cytoplasm and to COPI-coated vesicles (early Golgi); mtc1 is synthetically lethal with cdc13-1']
23603	dnadiffSNV	chrX	insertion	189051	189051	YJL123C	188004	189440	-1	.	T	['MTC1']	['Protein of unknown function that may interact with ribosomes; green fluorescent protein (GFP)-fusion protein localizes to the cytoplasm and to COPI-coated vesicles (early Golgi); mtc1 is synthetically lethal with cdc13-1']
23553	dnadiffSNV	chrX	deletion	114888	114902	YJL162C	113878	115629	-1	GTTGTTGCTGCTGTT	.	['JJJ2']	['Protein of unknown function, contains a J-domain, which is a region with homology to the E. coli DnaJ protein']
23554	dnadiffSNV	chrX	deletion	114905	114907	YJL162C	113878	115629	-1	TGT	.	['JJJ2']	['Protein of unknown function, contains a J-domain, which is a region with homology to the E. coli DnaJ protein']
23555	dnadiffSNV	chrX	deletion	114933	114935	YJL162C	113878	115629	-1	CTT	.	['JJJ2']	['Protein of unknown function, contains a J-domain, which is a region with homology to the E. coli DnaJ protein']
22303	dnadiffSNV	chrIV	insertion	584628	584628	YDR068W	583713	584645	1	.	ACGACGACGACGACGACGACGACG	['DOS2']	['Protein of unknown function, green fluorescent protein (GFP)-fusion protein localizes to the cytoplasm']
22147	dnadiffSNV	chrIII	deletion	59831	59831	YCL036W	59026	60726	1	A	.	['GFD2', 'YCD6']	['Protein of unknown function, identified as a high-copy suppressor of a dbp5 mutation']
22148	dnadiffSNV	chrIII	insertion	59853	59853	YCL036W	59026	60726	1	.	A	['GFD2', 'YCD6']	['Protein of unknown function, identified as a high-copy suppressor of a dbp5 mutation']
22149	dnadiffSNV	chrIII	insertion	59867	59867	YCL036W	59026	60726	1	.	T	['GFD2', 'YCD6']	['Protein of unknown function, identified as a high-copy suppressor of a dbp5 mutation']
22586	dnadiffSNV	chrIX	deletion	260219	260219	YIL049W	260158	260919	1	T	.	['DFG10']	['Protein of unknown function, involved in filamentous growth']
24248	dnadiffSNV	chrXIII	deletion	539520	539522	YMR135C	538689	540056	-1	CTG	.	['GID8', 'DCR1']	['Protein of unknown function, involved in proteasome-dependent catabolite inactivation of fructose-1,6-bisphosphatase; contains LisH and CTLH domains, like Vid30p; dosage-dependent regulator of START']
23101	dnadiffSNV	chrVII	insertion	3282	3282	YGL263W	2790	3932	1	.	A	['COS12']	['Protein of unknown function, member of the DUP380 subfamily of conserved, often subtelomerically-encoded proteins']
23354	dnadiffSNV	chrVIII	insertion	12228	12228	YHL046C	11923	12285	-1	.	AGAA	['PAU13']	['Protein of unknown function, member of the seripauperin multigene family encoded mainly in subtelomeric regions; expression is induced after ethanol shock']
23355	dnadiffSNV	chrVIII	insertion	12229	12229	YHL046C	11923	12285	-1	.	CA	['PAU13']	['Protein of unknown function, member of the seripauperin multigene family encoded mainly in subtelomeric regions; expression is induced after ethanol shock']
24736	dnadiffSNV	chrXVI	deletion	488912	488912	YPL032C	488887	491364	-1	T	.	['SVL3']	['Protein of unknown function, mutant phenotype suggests a potential role in vacuolar function; green fluorescent protein (GFP)-fusion protein localizes to the cell periphery, cytoplasm, bud, and bud neck']
24391	dnadiffSNV	chrXIV	deletion	138061	138061	YNL269W	137699	138094	1	A	.	['BSC4']	['Protein of unknown function, ORF exhibits genomic organization compatible with a translational readthrough-dependent mode of expression; readthrough is increased upon depletion of Sup35p']
24240	dnadiffSNV	chrXIII	deletion	515587	515598	YMR124W	514456	517287	1	CAACAACTTCAA	.	None	['Protein of unknown function; GFP-fusion protein localizes to the cell periphery, cytoplasm, bud, and bud neck; interacts with Crm1p in two-hybrid assay; YMR124W is not an essential gene; predicted to have a role in organelle organization']
24503	dnadiffSNV	chrXV	insertion	63085	63085	YOL138C	61325	65350	-1	.	ATC	['RTC1']	['Protein of unknown function; may interact with ribosomes, based on co-purification experiments; null mutation suppresses cdc13-1 temperature sensitivity']
23346	dnadiffSNV	chrVII	deletion	1059673	1059673	YGR283C	1059015	1060040	-1	T	.	None	['Protein of unknown function; may interact with ribosomes, based on co-purification experiments; predicted to be involved in ribosome biogenesis; null mutant is resistant to fluconazole; GFP-fusion protein localizes to the nucleolus']
24484	dnadiffSNV	chrXIV	deletion	751267	751267	YNR065C	750350	753700	-1	T	.	['YSN1']	['Protein of unknown function; protein-protein interactions suggest a possible role in actin patch formation; YNR065C is not an essential gene']
24485	dnadiffSNV	chrXIV	insertion	751271	751271	YNR065C	750350	753700	-1	.	A	['YSN1']	['Protein of unknown function; protein-protein interactions suggest a possible role in actin patch formation; YNR065C is not an essential gene']
24210	dnadiffSNV	chrXIII	deletion	416409	416409	YMR076C	416196	420029	-1	T	.	['PDS5']	['Protein required for establishment and maintenance of sister chromatid condensation and cohesion, colocalizes with cohesin on chromosomes, may function as a protein-protein interaction scaffold; also required during meiosis']
22073	dnadiffSNV	chrII	deletion	539239	539239	YBR148W	537876	539705	1	A	.	['YSW1']	['Protein required for normal prospore membrane formation; interacts with Gip1p, which is the meiosis-specific regulatory subunit of the Glc7p protein phosphatase; expressed specifically in spores and localizes to the prospore membrane']
22091	dnadiffSNV	chrII	insertion	656876	656876	YBR216C	655576	657600	-1	.	G	['YBP1']	['Protein required for oxidation of specific cysteine residues of the transcription factor Yap1p, resulting in the nuclear localization of Yap1p in response to stress']
23031	dnadiffSNV	chrVI	deletion	115168	115197	YFL010W-A	114990	115274	1	AAATCCGCCGTCGGACCCACCAGCATCATC	.	['AUA1', 'YFL011W-A']	['Protein required for the negative regulation by ammonia of Gap1p, which is a general amino acid permease']
21928	dnadiffSNV	chrI	insertion	193963	193963	YAR042W	192619	196185	1	.	ACA	['SWH1', 'OSH1', 'YAR044W']	['Protein similar to mammalian oxysterol-binding protein; contains ankyrin repeats; localizes to the Golgi and the nucleus-vacuole junction']
21929	dnadiffSNV	chrI	insertion	194035	194035	YAR042W	192619	196185	1	.	ATG	['SWH1', 'OSH1', 'YAR044W']	['Protein similar to mammalian oxysterol-binding protein; contains ankyrin repeats; localizes to the Golgi and the nucleus-vacuole junction']
24341	dnadiffSNV	chrXIII	insertion	811263	811263	YMR273C	811233	813980	-1	.	TGTTGTTGT	['ZDS1', 'CES1', 'CKM1', 'NRC1', 'OSS1']	['Protein with a role in regulating Swe1p-dependent polarized growth; interacts with silencing proteins at the telomere; has a role in Bcy1p localization; implicated in mRNA nuclear export; involved in mitotic exit through Cdc14p regulation']
24342	dnadiffSNV	chrXIII	insertion	811690	811690	YMR273C	811233	813980	-1	.	CTTGGACTTGTTCT	['ZDS1', 'CES1', 'CKM1', 'NRC1', 'OSS1']	['Protein with a role in regulating Swe1p-dependent polarized growth; interacts with silencing proteins at the telomere; has a role in Bcy1p localization; implicated in mRNA nuclear export; involved in mitotic exit through Cdc14p regulation']
24343	dnadiffSNV	chrXIII	insertion	811691	811691	YMR273C	811233	813980	-1	.	GAGC	['ZDS1', 'CES1', 'CKM1', 'NRC1', 'OSS1']	['Protein with a role in regulating Swe1p-dependent polarized growth; interacts with silencing proteins at the telomere; has a role in Bcy1p localization; implicated in mRNA nuclear export; involved in mitotic exit through Cdc14p regulation']
22267	dnadiffSNV	chrIV	insertion	423455	423455	YDL018C	422833	423510	-1	.	A	['ERP3']	['Protein with similarity to Emp24p and Erv25p, member of the p24 family involved in ER to Golgi transport']
22268	dnadiffSNV	chrIV	insertion	423466	423466	YDL018C	422833	423510	-1	.	A	['ERP3']	['Protein with similarity to Emp24p and Erv25p, member of the p24 family involved in ER to Golgi transport']
22269	dnadiffSNV	chrIV	insertion	423467	423467	YDL018C	422833	423510	-1	.	A	['ERP3']	['Protein with similarity to Emp24p and Erv25p, member of the p24 family involved in ER to Golgi transport']
22270	dnadiffSNV	chrIV	insertion	423482	423482	YDL018C	422833	423510	-1	.	A	['ERP3']	['Protein with similarity to Emp24p and Erv25p, member of the p24 family involved in ER to Golgi transport']
23490	dnadiffSNV	chrX	insertion	35873	35873	YJL212C	33850	36249	-1	.	A	['OPT1', 'GSH11', 'HGT1']	['Proton-coupled oligopeptide transporter of the plasma membrane; also transports glutathione and phytochelatin; member of the OPT family']
23970	dnadiffSNV	chrXII	insertion	507466	507466	YLR175W	506134	507585	1	.	ACAAGAAGG	['CBF5']	['Pseudouridine synthase catalytic subunit of box H/ACA small nucleolar ribonucleoprotein particles (snoRNPs), acts on both large and small rRNAs and on snRNA U2; mutations in human ortholog dyskerin cause the disorder dyskeratosis congenita']
22849	dnadiffSNV	chrV	insertion	243812	243812	YER047C	243810	246503	-1	.	TCA	['SAP1']	['Putative ATPase of the AAA family, interacts with the Sin1p transcriptional repressor in the two-hybrid system']
22850	dnadiffSNV	chrV	insertion	245663	245663	YER047C	243810	246503	-1	.	TTC	['SAP1']	['Putative ATPase of the AAA family, interacts with the Sin1p transcriptional repressor in the two-hybrid system']
22422	dnadiffSNV	chrIV	deletion	974691	974693	YDR259C	974631	975782	-1	TAG	.	['YAP6', 'HAL7']	['Putative basic leucine zipper (bZIP) transcription factor; overexpression increases sodium and lithium tolerance; computational analysis suggests a role in regulation of expression of genes involved in carbohydrate metabolism']
23723	dnadiffSNV	chrXI	insertion	66442	66442	YKL201C	63930	67466	-1	.	TTC	['MNN4', 'YKL200C']	['Putative positive regulator of mannosylphosphate transferase (Mnn6p), involved in mannosylphosphorylation of N-linked oligosaccharides; expression increases in late-logarithmic and stationary growth phases']
23903	dnadiffSNV	chrXII	deletion	221526	221526	YLR036C	221521	222132	-1	T	.	None	['Putative protein of unknown function predicted to have transmembrane domains; interacts with HSP90 by yeast two-hybrid analysis; YLR036C is not an essential protein']
24398	dnadiffSNV	chrXIV	deletion	157420	157420	YNL260C	156859	157455	-1	T	.	None	['Putative protein of unknown function with similarity to a human protein overexpressed in oral cancers; essential gene with defects in anaerobic and filamentous growth; localizes to the nucleus and cytoplasm']
24429	dnadiffSNV	chrXIV	deletion	373444	373444	YNL134C	372451	373581	-1	A	.	None	['Putative protein of unknown function with similarity to dehydrogenases from other model organisms; green fluorescent protein (GFP)-fusion protein localizes to both the cytoplasm and nucleus and is induced by the DNA-damaging agent MMS']
23091	dnadiffSNV	chrVI	deletion	226131	226131	YFR035C	226121	226465	-1	C	.	None	['Putative protein of unknown function, deletion mutant exhibits synthetic phenotype with alpha-synuclein']
23841	dnadiffSNV	chrXII	insertion	28304	28304	YLL056C	27409	28305	-1	.	T	None	['Putative protein of unknown function, transcription is activated by paralogous transcription factors Yrm1p and Yrr1p and genes involved in pleiotropic drug resistance (PDR); expression is induced in cells treated with the mycotoxin patulin']
22141	dnadiffSNV	chrIII	deletion	50598	50598	YCL042W	50584	50943	1	A	.	None	['Putative protein of unknown function; epitope-tagged protein localizes to the cytoplasm']
23617	dnadiffSNV	chrX	insertion	218875	218875	YJL107C	218853	220016	-1	.	A	None	['Putative protein of unknown function; expression is induced by activation of the HOG1 mitogen-activated signaling pathway and this induction is Hog1p/Pbs2p dependent; YJL107C and adjacent ORF, YJL108C are merged in related fungi']
24584	dnadiffSNV	chrXV	deletion	397488	397490	YOR034C-A	397426	397668	-1	AAA	.	None	['Putative protein of unknown function; identified by expression profiling and mass spectrometry']
24598	dnadiffSNV	chrXV	insertion	464498	464498	YOR072W-B	464469	464630	1	.	A	None	['Putative protein of unknown function; identified by expression profiling and mass spectrometry']
22589	dnadiffSNV	chrIX	deletion	268337	268337	YIL046W-A	268309	268473	1	A	.	None	['Putative protein of unknown function; identified by expression profiling and mass spectrometry']
22590	dnadiffSNV	chrIX	insertion	268445	268445	YIL046W-A	268309	268473	1	.	GG	None	['Putative protein of unknown function; identified by expression profiling and mass spectrometry']
22600	dnadiffSNV	chrIX	deletion	385654	385658	YIR018C-A	385564	385701	-1	TTTTT	.	None	['Putative protein of unknown function; identified by expression profiling and mass spectrometry']
22157	dnadiffSNV	chrIII	deletion	162721	162721	YCR024C-B	162599	162865	-1	A	.	None	['Putative protein of unknown function; identified by expression profiling and mass spectrometry']
22055	dnadiffSNV	chrII	insertion	382926	382926	YBR072C-A	382860	383021	-1	.	G	None	['Putative protein of unknown function; identified by fungal homology and RT-PCR']
22518	dnadiffSNV	chrIX	deletion	96586	96587	YIL134C-A	96522	96725	-1	AA	.	None	['Putative protein of unknown function; identified by fungal homology and RT-PCR']
23873	dnadiffSNV	chrXII	deletion	136438	136438	YLL006W-A	136345	136521	1	T	.	None	['Putative protein of unknown function; identified by fungal homology and RT-PCR']
22375	dnadiffSNV	chrIV	insertion	794606	794606	YDR169C-A	794574	794723	-1	.	G	None	['Putative protein of unknown function; identified by fungal homology and RT-PCR']
24109	dnadiffSNV	chrXIII	insertion	70295	70295	YML100W-A	70138	70311	1	.	C	None	['Putative protein of unknown function; identified by gene-trapping, microarray-based expression analysis, and genome-wide homology searching']
24536	dnadiffSNV	chrXV	deletion	301071	301072	YOL013W-A	301047	301238	1	TC	.	['YOL013W-B']	['Putative protein of unknown function; identified by SAGE']
24537	dnadiffSNV	chrXV	insertion	301215	301215	YOL013W-A	301047	301238	1	.	ATAGA	['YOL013W-B']	['Putative protein of unknown function; identified by SAGE']
22534	dnadiffSNV	chrIX	deletion	117411	117411	YIL127C	117024	117644	-1	T	.	['RRT14']	['Putative protein of unknown function; identified in a screen for mutants with decreased levels of rDNA transcription; green fluorescent protein (GFP)-fusion protein localizes to the nucleolus; predicted to be involved in ribosome biogenesis']
22535	dnadiffSNV	chrIX	deletion	117442	117442	YIL127C	117024	117644	-1	T	.	['RRT14']	['Putative protein of unknown function; identified in a screen for mutants with decreased levels of rDNA transcription; green fluorescent protein (GFP)-fusion protein localizes to the nucleolus; predicted to be involved in ribosome biogenesis']
22209	dnadiffSNV	chrIII	insertion	302537	302537	YCR101C	302482	303030	-1	.	C	None	['Putative protein of unknown function; localizes to the membrane fraction; YCR101C is not an essential gene']
23361	dnadiffSNV	chrVIII	deletion	15146	15151	YHL043W	14901	15413	1	CCAAAC	.	['ECM34']	['Putative protein of unknown function; member of the DUP380 subfamily of conserved, often subtelomerically-encoded proteins']
23362	dnadiffSNV	chrVIII	deletion	15409	15409	YHL043W	14901	15413	1	G	.	['ECM34']	['Putative protein of unknown function; member of the DUP380 subfamily of conserved, often subtelomerically-encoded proteins']
22352	dnadiffSNV	chrIV	deletion	701138	701152	YDR124W	700315	701289	1	AGTATTTCCCCAGGG	.	None	['Putative protein of unknown function; non-essential gene; expression is strongly induced by alpha factor']
24611	dnadiffSNV	chrXV	deletion	572182	572182	YOR131C	572182	572838	-1	T	.	None	['Putative protein of unknown function; non-essential gene; overexpression causes a cell cycle delay or arrest']
23359	dnadiffSNV	chrVIII	insertion	12540	12540	YHL045W	12502	12849	1	.	C	None	['Putative protein of unknown function; not an essential gene']
23360	dnadiffSNV	chrVIII	deletion	12559	12559	YHL045W	12502	12849	1	G	.	None	['Putative protein of unknown function; not an essential gene']
23647	dnadiffSNV	chrX	deletion	470177	470179	YJR023C	469804	470205	-1	AAT	.	None	['Putative protein of unknown function; open reading frame overlaps LSM8/YJR022W encoding an essential snRNP protein required for RNA processing and splicing']
23977	dnadiffSNV	chrXII	deletion	511532	511555	YLR177W	511054	512940	1	AGCAGCAGCAGCAGCAGCAACAGC	.	None	['Putative protein of unknown function; phosphorylated by Dbf2p-Mob1p in vitro; some strains contain microsatellite polymophisms at this locus; YLR177W is not an essential gene']
22473	dnadiffSNV	chrIV	deletion	1489441	1489441	YDR524W-C	1489403	1489492	1	T	.	['YDR524W-A']	['Putative protein of unknown function; small ORF identified by SAGE; deletion strains are moderately sensitive to the radiomimetic drug bleomycin']
24078	dnadiffSNV	chrXII	deletion	1047919	1047919	YLR454W	1043998	1051884	1	C	.	['FMP27']	['Putative protein of unknown function; the authentic, non-tagged protein is detected in highly purified mitochondria in high-throughput studies']
24079	dnadiffSNV	chrXII	insertion	1047932	1047932	YLR454W	1043998	1051884	1	.	A	['FMP27']	['Putative protein of unknown function; the authentic, non-tagged protein is detected in highly purified mitochondria in high-throughput studies']
21975	dnadiffSNV	chrII	insertion	136041	136041	YBL044W	135998	136366	1	.	A	None	['Putative protein of unknown function; YBL044W is not an essential protein']
21976	dnadiffSNV	chrII	insertion	136354	136354	YBL044W	135998	136366	1	.	A	None	['Putative protein of unknown function; YBL044W is not an essential protein']
22188	dnadiffSNV	chrIII	deletion	249328	249351	YCR076C	249293	250045	-1	CGGATCCTGAACCTCCAAATCCGC	.	None	['Putative protein of unknown function; YCR076C is not an essential gene']
23410	dnadiffSNV	chrVIII	insertion	149685	149685	YHR022C	149575	150345	-1	.	A	None	['Putative protein of unknown function; YHR022C is not an essential gene']
24213	dnadiffSNV	chrXIII	insertion	437397	437397	YMR084W	436628	437416	1	.	C	None	['Putative protein of unknown function; YMR084W and adjacent ORF YMR085W are merged in related strains']
24425	dnadiffSNV	chrXIV	insertion	324455	324455	YNL165W	323832	325052	1	.	A	None	['Putative protein of unknown function; YNL165W is not an essential gene']
24426	dnadiffSNV	chrXIV	insertion	324473	324473	YNL165W	323832	325052	1	.	T	None	['Putative protein of unknown function; YNL165W is not an essential gene']
24709	dnadiffSNV	chrXVI	deletion	144690	144698	YPL216W	143821	147129	1	GGAAACGTC	.	None	['Putative protein of unknown function; YPL216W is not an essential gene']
23050	dnadiffSNV	chrVI	deletion	168344	168368	YFR012W	167888	168496	1	CTTTGCATGCACCGTGATCCTGTTA	.	None	['Putative protein of unknown function']
23751	dnadiffSNV	chrXI	insertion	241941	241941	YKL105C	239185	242583	-1	.	T	None	['Putative protein of unknown function']
23104	dnadiffSNV	chrVII	deletion	9382	9382	YGL258W-A	9162	9395	1	A	.	None	['Putative protein of unknown function']
24535	dnadiffSNV	chrXV	deletion	299707	299707	YOL014W	299693	300067	1	T	.	None	['Putative protein of unknown function']
24562	dnadiffSNV	chrXV	deletion	356872	356872	YOR012W	356543	356956	1	T	.	None	['Putative protein of unknown function']
24059	dnadiffSNV	chrXII	deletion	950315	950315	YLR412C-A	950267	950473	-1	T	.	None	['Putative protein of unknown function']
24060	dnadiffSNV	chrXII	insertion	950337	950337	YLR412C-A	950267	950473	-1	.	G	None	['Putative protein of unknown function']
24061	dnadiffSNV	chrXII	insertion	950365	950365	YLR412C-A	950267	950473	-1	.	TT	None	['Putative protein of unknown function']
22200	dnadiffSNV	chrIII	deletion	289725	289725	YCR095W-A	289639	289797	1	T	.	None	['Putative protein of unknown function']
22207	dnadiffSNV	chrIII	insertion	301245	301245	YCR099C	300832	301299	-1	.	A	None	['Putative protein of unknown function']
22208	dnadiffSNV	chrIII	deletion	301275	301275	YCR099C	300832	301299	-1	A	.	None	['Putative protein of unknown function']
22208	dnadiffSNV	chrIII	deletion	301275	301275	YCR100C	301271	302221	-1	A	.	None	['Putative protein of unknown function']
22443	dnadiffSNV	chrIV	insertion	1150911	1150911	YDR340W	1150881	1151183	1	.	G	None	['Putative protein of unknown function']
21970	dnadiffSNV	chrII	insertion	133033	133033	YBL046W	132424	133749	1	.	ATGAAGACAATGGTGATGGAGAAGAGG	['PSY4']	['Putative regulatory subunit of an evolutionarily conserved protein phosphatase; localization is cell-cycle dependent and regulated by Cdc28p phosphorylation; required for cisplatin resistance; homolog of mammalian R2']
22225	dnadiffSNV	chrIV	insertion	161503	161503	YDL167C	160995	163154	-1	.	TAT	['NRP1']	['Putative RNA binding protein of unknown function; localizes to stress granules induced by glucose deprivation; predicted to be involved in ribosome biogenesis']
23731	dnadiffSNV	chrXI	deletion	68356	68358	YKL198C	68232	70220	-1	GAA	.	['PTK1', 'KKT8', 'POT1', 'STK1', 'YKL199C', 'YKT9']	['Putative serine/threonine protein kinase that regulates spermine uptake; involved in polyamine transport; possible mitochondrial protein']
23732	dnadiffSNV	chrXI	deletion	68362	68367	YKL198C	68232	70220	-1	GCGGAA	.	['PTK1', 'KKT8', 'POT1', 'STK1', 'YKL199C', 'YKT9']	['Putative serine/threonine protein kinase that regulates spermine uptake; involved in polyamine transport; possible mitochondrial protein']
23733	dnadiffSNV	chrXI	insertion	68454	68454	YKL198C	68232	70220	-1	.	CC	['PTK1', 'KKT8', 'POT1', 'STK1', 'YKL199C', 'YKT9']	['Putative serine/threonine protein kinase that regulates spermine uptake; involved in polyamine transport; possible mitochondrial protein']
23734	dnadiffSNV	chrXI	insertion	68468	68468	YKL198C	68232	70220	-1	.	G	['PTK1', 'KKT8', 'POT1', 'STK1', 'YKL199C', 'YKT9']	['Putative serine/threonine protein kinase that regulates spermine uptake; involved in polyamine transport; possible mitochondrial protein']
24806	dnadiffSNV	chrXVI	deletion	908184	908186	YPR185W	907218	909434	1	CAA	.	['ATG13', 'APG13']	['Regulatory subunit of the Atg1p signaling complex; stimulates Atg1p kinase activity; required for vesicle formation during autophagy and the cytoplasm-to-vacuole targeting (Cvt) pathway; involved in Atg9p, Atg23p, and Atg27p cycling']
24184	dnadiffSNV	chrXIII	deletion	367528	367536	YMR048W	366981	367934	1	TAAACAATG	.	['CSM3']	['Replication fork associated factor, required for stable replication fork pausing; component of the DNA replication checkpoint pathway; required for accurate chromosome segregation during meiosis']
22043	dnadiffSNV	chrII	deletion	299567	299572	YBR030W	298292	299950	1	GAAGAG	.	['RKM3']	['Ribosomal lysine methyltransferase specific for monomethylation of Rpl42ap and Rpl42bp (lysine 40); nuclear SET domain containing protein']
22351	dnadiffSNV	chrIV	insertion	694857	694857	YDR122W	694700	697894	1	.	GCA	['KIN1']	['Serine/threonine protein kinase involved in regulation of exocytosis; localizes to the cytoplasmic face of the plasma membrane; closely related to Kin2p']
22347	dnadiffSNV	chrIV	insertion	694047	694047	YDR121W	693585	694175	1	.	TTA	['DPB4']	['Shared subunit of DNA polymerase (II) epsilon and of ISW2/yCHRAC chromatin accessibility complex; involved in both chromosomal DNA replication and in inheritance of telomeric silencing']
22363	dnadiffSNV	chrIV	insertion	747107	747107	YDR145W	746738	748357	1	.	AACAACAACAACAAC	['TAF12', 'TAF61', 'TAF68']	['Subunit (61/68 kDa) of TFIID and SAGA complexes, involved in RNA polymerase II transcription initiation and in chromatin modification, similar to histone H2A']
22806	dnadiffSNV	chrV	deletion	83214	83216	YEL036C	83050	84552	-1	GTT	.	['ANP1', 'GEM3', 'MNN8']	['Subunit of the alpha-1,6 mannosyltransferase complex; type II membrane protein; has a role in retention of glycosyltransferases in the Golgi; involved in osmotic sensitivity and resistance to aminonitrophenyl propanediol']
24010	dnadiffSNV	chrXII	insertion	685663	685663	YLR272C	683672	687202	-1	.	CGT	['YCS4', 'LOC7']	['Subunit of the condensin complex; required for establishment and maintenance of chromosome condensation, chromosome segregation, chromatin binding of condensin, tRNA gene clustering at the nucleolus, and silencing at the mating type locus']
22074	dnadiffSNV	chrII	deletion	551690	551690	YBR156C	551104	553200	-1	T	.	['SLI15']	['Subunit of the conserved chromosomal passenger complex (CPC; Ipl1p-Sli15p-Bir1p-Nbl1p), which regulates kinetochore-microtubule attachments, activation of the spindle tension checkpoint, and mitotic spindle disassembly']
22075	dnadiffSNV	chrII	insertion	551782	551782	YBR156C	551104	553200	-1	.	T	['SLI15']	['Subunit of the conserved chromosomal passenger complex (CPC; Ipl1p-Sli15p-Bir1p-Nbl1p), which regulates kinetochore-microtubule attachments, activation of the spindle tension checkpoint, and mitotic spindle disassembly']
22076	dnadiffSNV	chrII	insertion	551814	551814	YBR156C	551104	553200	-1	.	T	['SLI15']	['Subunit of the conserved chromosomal passenger complex (CPC; Ipl1p-Sli15p-Bir1p-Nbl1p), which regulates kinetochore-microtubule attachments, activation of the spindle tension checkpoint, and mitotic spindle disassembly']
23157	dnadiffSNV	chrVII	insertion	53152	53152	YGL237C	52731	53528	-1	.	GCTGCTGCTGTTGTTGTTGTT	['HAP2']	['Subunit of the heme-activated, glucose-repressed Hap2p/3p/4p/5p CCAAT-binding complex, a transcriptional activator and global regulator of respiratory gene expression; contains sequences sufficient for both complex assembly and DNA binding']
24234	dnadiffSNV	chrXIII	deletion	497929	497929	YMR115W	497704	499209	1	A	.	['MGR3', 'FMP24']	['Subunit of the mitochondrial (mt) i-AAA protease supercomplex, which degrades misfolded mitochondrial proteins; forms a subcomplex with Mgr1p that binds to substrates to facilitate proteolysis; required for growth of cells lacking mtDNA']
22788	dnadiffSNV	chrV	insertion	42400	42400	YEL059C-A	42400	42624	-1	.	T	['SOM1']	['Subunit of the mitochondrial inner membrane peptidase, which is required for maturation of mitochondrial proteins of the intermembrane space; Som1p facilitates cleavage of a subset of substrates; contains twin cysteine-x9-cysteine motifs']
24108	dnadiffSNV	chrXIII	deletion	65949	65954	YML103C	62582	67549	-1	TGTTGT	.	['NUP188']	['Subunit of the nuclear pore complex (NPC), involved in the structural organization of the complex and of the nuclear envelope, also involved in nuclear envelope permeability, interacts with Pom152p and Nic96p']
23929	dnadiffSNV	chrXII	insertion	252778	252778	YLR055C	251272	253080	-1	.	GCAG	['SPT8']	['Subunit of the SAGA transcriptional regulatory complex but not present in SAGA-like complex SLIK/SALSA, required for SAGA-mediated inhibition at some promoters']
23930	dnadiffSNV	chrXII	insertion	252779	252779	YLR055C	251272	253080	-1	.	AG	['SPT8']	['Subunit of the SAGA transcriptional regulatory complex but not present in SAGA-like complex SLIK/SALSA, required for SAGA-mediated inhibition at some promoters']
23931	dnadiffSNV	chrXII	deletion	252873	252881	YLR055C	251272	253080	-1	CCTCCTGTT	.	['SPT8']	['Subunit of the SAGA transcriptional regulatory complex but not present in SAGA-like complex SLIK/SALSA, required for SAGA-mediated inhibition at some promoters']
23932	dnadiffSNV	chrXII	deletion	252889	252897	YLR055C	251272	253080	-1	GTCCTCTCG	.	['SPT8']	['Subunit of the SAGA transcriptional regulatory complex but not present in SAGA-like complex SLIK/SALSA, required for SAGA-mediated inhibition at some promoters']
24496	dnadiffSNV	chrXV	deletion	45898	45900	YOL148C	45760	47574	-1	ATT	.	['SPT20', 'ADA5']	['Subunit of the SAGA transcriptional regulatory complex, involved in maintaining the integrity of the complex']
22305	dnadiffSNV	chrIV	deletion	592579	592590	YDR073W	592439	592948	1	AAATGCAACTGC	.	['SNF11']	['Subunit of the SWI/SNF chromatin remodeling complex involved in transcriptional regulation; interacts with a highly conserved 40-residue sequence of Snf2p']
24748	dnadiffSNV	chrXVI	deletion	521107	521121	YPL016W	521014	524958	1	ACTAATAATAATAAT	.	['SWI1', 'ADR6', 'GAM3', 'LPA1']	['Subunit of the SWI/SNF chromatin remodeling complex, which regulates transcription by remodeling chromosomes; required for transcription of many genes, including ADH1, ADH2, GAL1, HO, INO1 and SUC2; can form the prion [SWI+]']
24749	dnadiffSNV	chrXVI	insertion	522073	522073	YPL016W	521014	524958	1	.	AGCAACAACAACAACAACAACAGCAGCAGCAGCAGC	['SWI1', 'ADR6', 'GAM3', 'LPA1']	['Subunit of the SWI/SNF chromatin remodeling complex, which regulates transcription by remodeling chromosomes; required for transcription of many genes, including ADH1, ADH2, GAL1, HO, INO1 and SUC2; can form the prion [SWI+]']
24750	dnadiffSNV	chrXVI	insertion	522083	522083	YPL016W	521014	524958	1	.	ACAACC	['SWI1', 'ADR6', 'GAM3', 'LPA1']	['Subunit of the SWI/SNF chromatin remodeling complex, which regulates transcription by remodeling chromosomes; required for transcription of many genes, including ADH1, ADH2, GAL1, HO, INO1 and SUC2; can form the prion [SWI+]']
24751	dnadiffSNV	chrXVI	insertion	522105	522105	YPL016W	521014	524958	1	.	CAACAGCAACAACAGCAACAGCAACAG	['SWI1', 'ADR6', 'GAM3', 'LPA1']	['Subunit of the SWI/SNF chromatin remodeling complex, which regulates transcription by remodeling chromosomes; required for transcription of many genes, including ADH1, ADH2, GAL1, HO, INO1 and SUC2; can form the prion [SWI+]']
24226	dnadiffSNV	chrXIII	insertion	478301	478301	YMR106C	478301	480190	-1	.	T	['YKU80', 'HDF2']	['Subunit of the telomeric Ku complex (Yku70p-Yku80p), involved in telomere length maintenance, structure and telomere position effect; relocates to sites of double-strand cleavage to promote nonhomologous end joining during DSB repair']
23879	dnadiffSNV	chrXII	deletion	157598	157603	YLR003C	156855	157730	-1	CGTCAT	.	['CMS1']	['Subunit of U3-containing 90S preribosome processome complex involved in production of 18S rRNA and assembly of small ribosomal subunit; overexpression rescues supressor mutant of mcm10; null mutant is viable']
24614	dnadiffSNV	chrXV	insertion	630521	630521	YOR156C	628360	630540	-1	.	TAT	['NFI1', 'SIZ2']	['SUMO ligase, catalyzes the covalent attachment of SUMO (Smt3p) to proteins; involved in maintenance of proper telomere length']
22026	dnadiffSNV	chrII	deletion	270401	270403	YBR016W	270247	270633	1	AGC	.	None	['Tail-anchored plasma membrane protein containing a conserved CYSTM module; predicted to be palmitoylated; has similarity to hydrophilins, which are involved in the adaptive response to hyperosmotic conditions']
24407	dnadiffSNV	chrXIV	insertion	214099	214099	YNL233W	211922	214600	1	.	GAA	['BNI4']	['Targeting subunit for Glc7p protein phosphatase, localized to the bud neck, required for localization of chitin synthase III to the bud neck via interaction with the chitin synthase III regulatory subunit Skt5p']
24174	dnadiffSNV	chrXIII	deletion	276384	276384	YMR005W	276045	277211	1	A	.	['TAF4', 'MPT1', 'TAF48', 'TSG2']	['TFIID subunit (48 kDa), involved in RNA polymerase II transcription initiation; potential Cdc28p substrate']
24182	dnadiffSNV	chrXIII	insertion	354572	354572	YMR043W	353871	354731	1	.	CAACAACAACAA	['MCM1', 'FUN80']	['Transcription factor involved in cell-type-specific transcription and pheromone response; plays a central role in the formation of both repressor and activator complexes']
24267	dnadiffSNV	chrXIII	deletion	587657	587668	YMR164C	587274	589550	-1	TATTATTATTAT	.	['MSS11']	['Transcription factor involved in regulation of invasive growth and starch degradation; controls the activation of MUC1 and STA2 in response to nutritional signals']
24268	dnadiffSNV	chrXIII	deletion	587687	587692	YMR164C	587274	589550	-1	TATTAT	.	['MSS11']	['Transcription factor involved in regulation of invasive growth and starch degradation; controls the activation of MUC1 and STA2 in response to nutritional signals']
24269	dnadiffSNV	chrXIII	deletion	588604	588606	YMR164C	587274	589550	-1	TGC	.	['MSS11']	['Transcription factor involved in regulation of invasive growth and starch degradation; controls the activation of MUC1 and STA2 in response to nutritional signals']
24270	dnadiffSNV	chrXIII	deletion	588631	588633	YMR164C	587274	589550	-1	TGC	.	['MSS11']	['Transcription factor involved in regulation of invasive growth and starch degradation; controls the activation of MUC1 and STA2 in response to nutritional signals']
22953	dnadiffSNV	chrV	deletion	377458	377481	YER109C	375215	377614	-1	GCTGCTGTTGCTGCTGCTGCTGTT	.	['FLO8', 'PHD5', 'YER108C']	['Transcription factor required for flocculation, diploid filamentous growth, and haploid invasive growth; genome reference strain S288C and most laboratory strains have a mutation in this gene']
22063	dnadiffSNV	chrII	insertion	475278	475278	YBR117C	474392	476437	-1	.	TTT	['TKL2']	['Transketolase, similar to Tkl1p; catalyzes conversion of xylulose-5-phosphate and ribose-5-phosphate to sedoheptulose-7-phosphate and glyceraldehyde-3-phosphate in the pentose phosphate pathway; needed for synthesis of aromatic amino acids']
23842	dnadiffSNV	chrXII	deletion	41284	41284	YLL048C	41280	46265	-1	T	.	['YBT1', 'BAT1']	['Transporter of the ATP-binding cassette (ABC) family involved in bile acid transport; similar to mammalian bile transporters']
22029	dnadiffSNV	chrII	deletion	272557	272562	YBR017C	270947	273703	-1	CATCAT	.	['KAP104']	['Transportin or cytosolic karyopherin beta 2; functions in the rg-nuclear localization signal-mediated nuclear import/reimport of mRNA-binding proteins Nab2p and Hrp1p; regulates asymmetric protein synthesis in daughter cells during mitosis']
21959	dnadiffSNV	chrII	insertion	111648	111648	YBL058W	111437	112708	1	.	CTC	['SHP1', 'UBX1']	['UBX (ubiquitin regulatory X) domain-containing protein that regulates Glc7p phosphatase activity and interacts with Cdc48p; interacts with ubiquitylated proteins in vivo and is required for degradation of a ubiquitylated model substrate']
23031	dnadiffSNV	chrVI	deletion	115168	115197	YFL010C	115108	115743	-1	AAATCCGCCGTCGGACCCACCAGCATCATC	.	['WWM1']	['WW domain containing protein of unknown function; binds to Mca1p, a caspase-related protease that regulates H2O2-induced apoptosis; overexpression causes G1 phase growth arrest and clonal death that is suppressed by overexpression of MCA1']
22529	dnadiffSNV	chrIX	deletion	105250	105252	YIL130W	102782	105676	1	CAA	.	['ASG1']	['Zinc cluster protein proposed to function as a transcriptional regulator involved in the stress response; null mutants have a respiratory deficiency, calcofluor white sensitivity and slightly increased cycloheximide resistance']
22530	dnadiffSNV	chrIX	insertion	105350	105350	YIL130W	102782	105676	1	.	ACAACAACAATAATAATAATA	['ASG1']	['Zinc cluster protein proposed to function as a transcriptional regulator involved in the stress response; null mutants have a respiratory deficiency, calcofluor white sensitivity and slightly increased cycloheximide resistance']
22531	dnadiffSNV	chrIX	insertion	105441	105441	YIL130W	102782	105676	1	.	TAA	['ASG1']	['Zinc cluster protein proposed to function as a transcriptional regulator involved in the stress response; null mutants have a respiratory deficiency, calcofluor white sensitivity and slightly increased cycloheximide resistance']
23224	dnadiffSNV	chrVII	deletion	469257	469271	YGL013C	469092	472298	-1	GTTGTTGTTGTTATT	.	['PDR1', 'AMY1', 'ANT1', 'BOR2', 'CYH3', 'NRA2', 'SMR2', 'TIL1', 'TPE1', 'TPE3']	['Zinc cluster protein that is a master regulator involved in recruiting other zinc cluster proteins to pleiotropic drug response elements (PDREs) to fine tune the regulation of multidrug resistance genes']
24347	dnadiffSNV	chrXIII	deletion	828324	828335	YMR280C	827028	831329	-1	TCGTTTTGCATC	.	['CAT8', 'DIL1', 'MSP8']	['Zinc cluster transcriptional activator necessary for derepression of a variety of genes under non-fermentative growth conditions, active after diauxic shift, binds carbon source responsive elements']
23240	dnadiffSNV	chrVII	insertion	583134	583134	YGR044C	582990	583892	-1	.	T	['RME1', 'CSP1']	['Zinc finger protein involved in control of meiosis; prevents meiosis by repressing IME1 expression and promotes mitosis by activating CLN2 expression; directly repressed by a1-alpha2 regulator; mediates cell type control of sporulation']
23241	dnadiffSNV	chrVII	insertion	583195	583195	YGR044C	582990	583892	-1	.	A	['RME1', 'CSP1']	['Zinc finger protein involved in control of meiosis; prevents meiosis by repressing IME1 expression and promotes mitosis by activating CLN2 expression; directly repressed by a1-alpha2 regulator; mediates cell type control of sporulation']
23242	dnadiffSNV	chrVII	deletion	583205	583205	YGR044C	582990	583892	-1	A	.	['RME1', 'CSP1']	['Zinc finger protein involved in control of meiosis; prevents meiosis by repressing IME1 expression and promotes mitosis by activating CLN2 expression; directly repressed by a1-alpha2 regulator; mediates cell type control of sporulation']
23243	dnadiffSNV	chrVII	insertion	583214	583214	YGR044C	582990	583892	-1	.	A	['RME1', 'CSP1']	['Zinc finger protein involved in control of meiosis; prevents meiosis by repressing IME1 expression and promotes mitosis by activating CLN2 expression; directly repressed by a1-alpha2 regulator; mediates cell type control of sporulation']
23992	dnadiffSNV	chrXII	insertion	650620	650620	YLR256W	646415	650923	1	.	C	['HAP1', 'CYP1']	['Zinc finger transcription factor involved in the complex regulation of gene expression in response to levels of heme and oxygen; the S288C sequence differs from other strain backgrounds due to a Ty1 insertion in the carboxy terminus']
23327	dnadiffSNV	chrVII	insertion	985448	985448	YGR247W	984966	985685	1	.	A	['CPD1']	["Cyclic nucleotide phosphodiesterase, hydrolyzes ADP-ribose 1'', 2''-cyclic phosphate to ADP-ribose 1''-phosphate; may have a role in tRNA splicing; no detectable phenotype is conferred by null mutation or by overexpression"]
23328	dnadiffSNV	chrVII	insertion	985484	985484	YGR247W	984966	985685	1	.	A	['CPD1']	["Cyclic nucleotide phosphodiesterase, hydrolyzes ADP-ribose 1'', 2''-cyclic phosphate to ADP-ribose 1''-phosphate; may have a role in tRNA splicing; no detectable phenotype is conferred by null mutation or by overexpression"]
23329	dnadiffSNV	chrVII	insertion	985485	985485	YGR247W	984966	985685	1	.	T	['CPD1']	["Cyclic nucleotide phosphodiesterase, hydrolyzes ADP-ribose 1'', 2''-cyclic phosphate to ADP-ribose 1''-phosphate; may have a role in tRNA splicing; no detectable phenotype is conferred by null mutation or by overexpression"]
24348	dnadiffSNV	chrXIII	deletion	851724	851725	YMR290W-A	851422	851769	1	AA	.	None	["Dubious open reading frame unlikely to encode a functional protein, based on available experimental and comparative sequence data; overlaps 5' end of essential HAS1 gene which encodes an ATP-dependent RNA helicase"]
24623	dnadiffSNV	chrXV	insertion	722803	722803	YOR203W	722565	722918	1	.	A	None	["Dubious open reading frame unlikely to encode a protein, based on available experimental and comparative sequence data; overlaps 5' end of essential DED1 gene required for translation initiation"]
24624	dnadiffSNV	chrXV	deletion	722836	722836	YOR203W	722565	722918	1	A	.	None	["Dubious open reading frame unlikely to encode a protein, based on available experimental and comparative sequence data; overlaps 5' end of essential DED1 gene required for translation initiation"]
24110	dnadiffSNV	chrXIII	deletion	71315	71317	YML100W	70624	73920	1	CCT	.	['TSL1']	["Large subunit of trehalose 6-phosphate synthase (Tps1p)/phosphatase (Tps2p) complex, which converts uridine-5'-diphosphoglucose and glucose 6-phosphate to trehalose, similar to Tps3p and may share function; mutant has aneuploidy tolerance"]
22086	dnadiffSNV	chrII	deletion	649360	649365	YBR212W	647886	649904	1	AGCAGC	.	['NGR1', 'RBP1']	["RNA binding protein that negatively regulates growth rate; interacts with the 3' UTR of the mitochondrial porin (POR1) mRNA and enhances its degradation; overexpression impairs mitochondrial function; expressed in stationary phase"]
24467	dnadiffSNV	chrXIV	deletion	720300	720314	YNR052C	719346	720647	-1	CTGTTGTTGTTGCTG	.	['POP2', 'CAF1']	["RNase of the DEDD superfamily, subunit of the Ccr4-Not complex that mediates 3' to 5' mRNA deadenylation"]
