# Supplementary material for: De novo sequencing, assembly and analysis of the genome of the laboratory strain Saccharomyces cerevisiae CEN.PK113-7D, a model for modern industrial biotechnology
Source: Microb Cell Fact. 2012 Mar 26;11:36. doi: 10.1186/1475-2859-11-36 (PMC3364882; doi:10.1186/1475-2859-11-36)
Supplement: Additional file 11 — Figure S5. Multiple sequence alignment of Snf11p and Swi1p. [file 1475-2859-11-36-S11.PDF]

# Snf11p

|             |                                                                                    |
|-------------|------------------------------------------------------------------------------------|
| YJM789      | SNTNTNTENENRNTGAGVDVNT <b>NANATANATA</b> -----ELNLPTVDEQRQYKVQLLLHINSILLARV        |
| Kyokai no.7 | SNTNTNTENENRNTGAGVDVNT <b>NANANANATANATA</b> -----ELNLPTVDEQRQYKIQLLLHINSILLARV    |
| FostersO    | SNTNTNTENENXNTGAGVDVNT <b>NANAXANATANATA</b> -----ELNLPTVDEQRQYKVQLLLHINSILLARV    |
| FostersB    | SNTNTNTENENRNTGAGVDVNT <b>NANANANATANATA</b> -----ELNLPTVDEQRQYKVQLLLHINSILLARV    |
| CEN.PK      | SNTNTNTENENRNTGAGVDVNT <b>NANANANATANATANATA</b> ---ELNLPTVDEQRQYKVQLLLHINSILLARV  |
| S288c       | SNTNTNTENENRNTGAGVDVNT <b>NANANANATANATANATANATA</b> ELNLPTVDEQRQYKVQLLLHINSILLARV |
| EC1118      | SNTNTNTENENRNTGAGVDVNT <b>NANATANATANATANATANATA</b> ELNLPTVDEQRQYKVQLLLHINSILLARV |

# Swi1p

|             |             |                                                              |         |
|-------------|-------------|--------------------------------------------------------------|---------|
| YJM789      | QQKQQQRFQAL | QQQQQQQQQQQQQQQQQQQQ--QQQQQQQQNQNPQQNQNPQQQQQQQQQQQQQQQQQQNP | KFLQSQR |
| Kyokai no.7 | QQKQQQRFQAL | QQQQQQQQQQ-----NQNPQQNQNPQQQ-----QQQQQQQQQQQQQQQQQQNP        | KFLQSQR |
| CEN.PK      | QQKQQQRFQAL | QQQQQQQQQQQQQQQQQQQQNQNPQQNQNPQQQ-----QQQQQQQQQQQQQQQQQQNP   | KFLQSQR |
| S288c       | QQKQQQRFQAL | QQQQQQQQQQ-----NQQQ-----QNQQPQQQQQQQQQQNP                    | KFLQSQR |
| EC1118      | QQKQQQRFQAL | QQQQQQQQQQ-----QQQQQQQQQQNQQQ-----QNQQPQQQQQQQQQQNP          | KFLQSQR |
| JAY291      | QQKQQQRFQAL | QQQQQQQQQQ-----QQQQQQQQQQNQQQ-----QNQQPQQQQQQQQQQNP          | KFLQSQR |
| RM11-1a     | QQKQQQRFQAL | QQQQQQQQQQ-----QQQQQQQQQQQQQQQQ-----QNQQPQQQQQQQQQQNP        | KFLQSQR |
