# Supplementary material for: De novo sequencing, assembly and analysis of the genome of the laboratory strain Saccharomyces cerevisiae CEN.PK113-7D, a model for modern industrial biotechnology
Source: Microb Cell Fact. 2012 Mar 26;11:36. doi: 10.1186/1475-2859-11-36 (PMC3364882; doi:10.1186/1475-2859-11-36)
Supplement: Additional file 13 — Table S6. List of deleted genes, which is defined as not having a homologous hit in the CEN.PK113-7D genome for at least 95% and having a CEN.PK113-7D/S288c log2 ratio of less then -0.6. The PMR2 locus has a blue background color. [file 1475-2859-11-36-S13.XLSX]

## Sheet: Table S5 absent genes
ORFs	log2	alias	classification	description	Subtelomeric (<40 kbp from end)
Q0140	-0.91	VAR1	Verified	Mitochondrial ribosomal protein of the small subunit, mitochondrially-encoded; polymorphic in different strains due to variation in number of AAT (asparagine) codons; translated near the mitochondrial inner membrane	no
YAL063C	-2.73	FLO9	Verified	Lectin-like protein with similarity to Flo1p, thought to be expressed and involved in flocculation	yes
YAL063C-A	-2.73	YAL063C-A	Uncharacterized	Putative protein of unknown function; identified by expression profiling and mass spectrometry	yes
YAL064C-A	-2.73	YAL064C-A	Uncharacterized	Putative protein of unknown function; YAL064C-A is not an essential gene	yes
YAL064W	-2.73	YAL064W	Verified	Protein of unknown function; may interact with ribosomes, based on co-purification experiments	yes
YAL064W-B	-2.73	YAL064W-B	Uncharacterized	Fungal-specific protein of unknown function	yes
YAL065C	-2.73	YAL065C	Uncharacterized	Putative protein of unknown function; has homology to FLO1; possible pseudogene	yes
YAL066W	-2.73	YAL066W	Dubious	Dubious open reading frame unlikely to encode a protein, based on available experimental and comparative sequence data	yes
YAL067C	-2.73	SEO1	Verified	Putative permease, member of the allantoate transporter subfamily of the major facilitator superfamily; mutation confers resistance to ethionine sulfoxide	yes
YAL067W-A	-2.73	YAL067W-A	Uncharacterized	Putative protein of unknown function; identified by gene-trapping, microarray-based expression analysis, and genome-wide homology searching	yes
YAR035C-A	-0.98	YAR035C-A	Uncharacterized	Putative protein of unknown function; identified by gene-trapping, microarray-based expression analysis, and genome-wide homology searching; predicted to have a role in cell budding based o	yes
YAR047C	-3.63	YAR047C	Dubious	Dubious open reading frame unlikely to encode a protein, based on available experimental and comparative sequence data	yes
YAR050W	-3.63	FLO1	Verified	Lectin-like protein involved in flocculation, cell wall protein that binds to mannose chains on the surface of other cells, confers floc-forming ability that is chymotrypsin sensitive and heat resistant; similar to F	yes
YAR053W	-1.1	YAR053W	Dubious	Dubious open reading frame unlikely to encode a protein, based on available experimental and comparative sequence data	yes
YAR073W	-2.45	IMD1	Dubious	Nonfunctional protein with homology to IMP dehydrogenase; probable pseudogene, located close to the telomere; is not expressed at detectable levels; YAR073W and YAR075W comprise a continuous reading frame in some stra	yes
YAR075W	-2.45	YAR075W	Dubious	Non-functional protein with homology IMP dehydrogenase; YAR073W/IMD1 and YAR075W comprise a continuous reading frame in some strains of S. cerevisiae.	yes
YBL109W	-1.13	YBL109W	Dubious	Dubious open reading frame unlikely to encode a protein, based on experimental and comparative sequence data	yes
YBL111C	-0.94	YBL111C	Uncharacterized	Helicase-like protein encoded within the telomeric Y' element	yes
YBL113C	-1.13	YBL113C	Uncharacterized	Helicase-like protein encoded within the telomeric Y' element	yes
YBR093C	-2.42	PHO5	Verified	Repressible acid phosphatase (1 of 3) that also mediates extracellular nucleotide-derived phosphate hydrolysis; secretory pathway derived cell surface glycoprotein; induced by phosphate starvatio	no
YCR040W	-0.8	MATALPHA1	Verified	Transcriptional co-activator involved in regulation of mating-type-specific gene expression; targets the transcription factor Mcm1p to the promoters of alpha-specific genes; one of two genes encoded by the MATalpha	no
YCR041W	-0.8	YCR041W	Dubious	Dubious open reading frame unlikely to encode a protein, based on available experimental and comparative sequence data	no
YCR105W	-2.69	ADH7	Verified	NADPH-dependent medium chain alcohol dehydrogenase with broad substrate specificity; member of the cinnamyl family of alcohol dehydrogenases; may be involved in fusel alcohol synthesis or in aldehyde tolerance	yes
YCR106W	-2.69	RDS1	Verified	Zinc cluster transcription factor involved in conferring resistance to cycloheximide	yes
YCR107W	-2.69	AAD3	Verified	Putative aryl-alcohol dehydrogenase with similarity to P. chrysosporium aryl-alcohol dehydrogenase; mutational analysis has not yet revealed a physiological role	yes
YCR108C	-2.69	YCR108C	Uncharacterized	Putative protein of unknown function; identified by fungal homology and RT-PCR	yes
YDR036C	-3.15	EHD3	Verified	3-hydroxyisobutyryl-CoA hydrolase, member of a family of enoyl-CoA hydratase/isomerases; non-tagged protein is detected in highly purified mitochondria in high-throughput studies; phosphorylated;	no
YDR038C	-3.15	ENA5	Verified	Protein with similarity to P-type ATPase sodium pumps, member of the Na+ efflux ATPase family	no
YDR039C	-3.15	ENA2	Verified	P-type ATPase sodium pump, involved in Na+ efflux to allow salt tolerance; likely not involved in Li+ efflux	no
YDR040C	-3.15	ENA1	Verified	P-type ATPase sodium pump, involved in Na+ and Li+ efflux to allow salt tolerance	no
YDR543C	-1.19	YDR543C	Dubious	Dubious open reading frame unlikely to encode a functional protein, based on available experimental and comparative sequence data	no
YDR544C	-1.19	YDR544C	Dubious	Dubious open reading frame unlikely to encode a functional protein, based on available experimental and comparative sequence data	no
YDR545W	-1.19	YRF1-1	Verified	Helicase encoded by the Y' element of subtelomeric regions, highly expressed in the mutants lacking the telomerase component TLC1; potentially phosphorylated by Cdc28p	no
YEL074W	-0.82	YEL074W	Dubious	Hypothetical protein	yes
YEL075W-A	-0.82	YEL075W-A	Dubious	Dubious open reading frame unlikely to encode a functional protein, based on available experimental and comparative sequence data	yes
YEL076C	-0.82	YEL076C	Uncharacterized	Putative protein of unknown function	yes
YEL077C	-1.02	YEL077C	Uncharacterized	Helicase-like protein encoded within the telomeric Y' element	yes
YER190C-A	-1.16	YER190C-A	Dubious	Dubious open reading frame unlikely to encode a protein, based on available experimental and comparative sequence data; completely overlaps the verified ORF YRF1-2/YER190W; identified by gene-trapp	yes
YER190W	-1.16	YRF1-2	Verified	Helicase encoded by the Y' element of subtelomeric regions, highly expressed in the mutants lacking the telomerase component TLC1; potentially phosphorylated by Cdc28p; induced by treatment with 8-methoxypsoralen and	yes
YFL064C	-1.1	YFL064C	Uncharacterized	Putative protein of unknown function	yes
YFL065C	-1.1	YFL065C	Uncharacterized	Putative protein of unknown function; induced by treatment with 8-methoxypsoralen and UVA irradiation	yes
YFL067W	-0.96	YFL067W	Uncharacterized	Protein of unknown function, down-regulated at low calcium levels	yes
YGL255W	-0.93	ZRT1	Verified	High-affinity zinc transporter of the plasma membrane, responsible for the majority of zinc uptake; transcription is induced under low-zinc conditions by the Zap1p transcription factor	yes
YGL258W-A	-0.98	YGL258W-A	Uncharacterized	Putative protein of unknown function	yes
YGR296C-A	-1.24	YGR296C-A	Dubious	Dubious open reading frame unlikely to encode a protein, based on available experimental and comparative sequence data; completely overlaps TEL07R	yes
YHL008C	-2	YHL008C	Uncharacterized	Putative protein of unknown function, may be involved in the uptake of chloride ions; does not appear to be involved in monocarboxylic acid transport; green fluorescent protein (GFP)-fusio	no
YHL045W	-2.45	YHL045W	Dubious	Putative protein of unknown function; not an essential gene	yes
YHL046W-A	-2.45	YHL046W-A	Dubious	Dubious open reading frame unlikely to encode a functional protein, based on available experimental and comparative sequence data	yes
YHL047C	-2.45	ARN2	Verified	Transporter, member of the ARN family of transporters that specifically recognize siderophore-iron chelates; responsible for uptake of iron bound to the siderophore triacetylfusarinine C	yes
YHL048W	-2.45	COS8	Verified	Nuclear membrane protein, member of the DUP380 subfamily of conserved, often subtelomerically-encoded proteins; regulation suggests a potential role in the unfolded protein response	yes
YHL049C	-2.45	YHL049C	Uncharacterized	Putative protein of unknown function	yes
YHR056C	-1.51	RSC30	Verified	Component of the RSC chromatin remodeling complex; non-essential gene required for regulation of ribosomal protein genes and the cell wall/stress response; highly similar to Rsc3p; null mutants	no
YHR217C	-1.09	YHR217C	Dubious	Dubious open reading frame unlikely to encode a protein, based on available experimental and comparative sequence data; located in the telomeric region TEL08R.	yes
YHR218W	-1.09	YHR218W	Uncharacterized	Helicase-like protein encoded within the telomeric Y' element	yes
YHR219W	-1.03	YHR219W	Uncharacterized	Putative protein of unknown function with similarity to helicases; located in the telomere region on the right arm of chromosome VIII	yes
YIL046W-A	-0.75	YIL046W-A	Uncharacterized	Putative protein of unknown function; identified by expression profiling and mass spectrometry	no
YLL063C	-1.44	AYT1	Verified	Acetyltransferase; catalyzes trichothecene 3-O-acetylation, suggesting a possible role in trichothecene biosynthesis	yes
YLL065W	-1.44	YLL065W	Dubious	Dubious open reading frame unlikely to encode a protein, based on available experimental and comparative sequence data; overlaps chromosome XII telomeric element core sequences	yes
YLL066W-B	-1.44	YLL066W-B	Uncharacterized	Putative protein of unknown function; overexpression causes a cell cycle delay or arrest	yes
YLR055C	-0.99	SPT8	Verified	Subunit of the SAGA transcriptional regulatory complex but not present in SAGA-like complex SLIK/SALSA, required for SAGA-mediated inhibition at some promoters	no
YLR154C-H	-1.01	YLR154C-H	Uncharacterized	Putative protein of unknown function identified by fungal homology comparisons and RT-PCR; this ORF partially overlaps RND5-2	no
YLR156C-A	-0.95	YLR156C-A	Uncharacterized	Putative protein of unknown function identified by fungal homology comparisons and RT-PCR; this ORF partially overlaps RND5-3	no
YLR157C-C	-0.94	YLR157C-C	Uncharacterized	Putative protein of unknown function identified by fungal homology comparisons and RT-PCR; this ORF partially overlaps RND5-4	no
YLR159C-A	-0.96	YLR159C-A	Uncharacterized	Putative protein of unknown function identified by fungal homology comparisons and RT-PCR; this ORF partially overlaps RND5-5	no
YLR463C	-1.16	YLR463C	Dubious	Dubious open reading frame unlikely to encode a protein, based on available experimental and comparative sequence data; overlaps the uncharacterized ORFs YLR462W and YLR464W	yes
YLR465C	-1.16	BSC3	Dubious	Dubious open reading frame, unlikely to encode a protein; not conserved in closely related Saccharomyces species; 100% of YLR465C overlaps the uncharacterized ORF YLR464W and 86% of YLR465C ove	yes
YLR466C-B	-1.16	YLR466C-B	Uncharacterized	Dubious open reading frame unlikely to encode a protein, based on available experimental and comparative sequence data	yes
YLR466W	-1.16	YRF1-4	Verified	Helicase encoded by the Y' element of subtelomeric regions, highly expressed in the mutants lacking the telomerase component TLC1; potentially phosphorylated by Cdc28p	yes
YLR467W	-1.24	YRF1-5	Verified	Helicase encoded by the Y' element of subtelomeric regions, highly expressed in the mutants lacking the telomerase component TLC1; potentially phosphorylated by Cdc28p	yes
YML133W-A	-1.23	YML133W-A	Dubious	Dubious open reading frame unlikely to encode a protein, based on available experimental and comparative sequence data; completely overlaps the uncharacterized ORF YML133C	yes
YNL338W	-0.8	YNL338W	Dubious	Dubious open reading frame unlikely to encode a protein, based on available experimental and comparative sequence data; completely overlaps TEL14L-XC, which is Telomeric X element Core sequence on the left arm of Chromo	yes
YNL339W-A	-1.21	YNL339W-A	Dubious	Identified by gene-trapping, microarray-based expression analysis, and genome-wide homology searching	yes
YNR070W	-2.95	PDR18	Uncharacterized	Putative transporter of the ATP-binding cassette (ABC) family, implicated in pleiotropic drug resistance; the authentic, non-tagged protein is detected in highly purified mitochondria in high-throughput stud	yes
YNR071C	-2.95	YNR071C	Uncharacterized	Putative protein of unknown function	yes
YNR074C	-2.95	AIF1	Verified	Mitochondrial cell death effector that translocates to the nucleus in response to apoptotic stimuli, homolog of mammalian Apoptosis-Inducing Factor, putative reductase	yes
YNR075C-A	-1.12	YNR075C-A	Uncharacterized	Identified by gene-trapping, microarray-based expression analysis, and genome-wide homology searching	yes
YNR077C	-1.12	YNR077C	Dubious	Dubious open reading frame unlikely to encode a protein, based on available experimental and comparative sequence data	yes
YOR029W	-0.97	YOR029W	Dubious	Dubious open reading frame unlikely to encode a functional protein, based on available experimental and comparative sequence data	no
YOR082C	-0.98	YOR082C	Dubious	Dubious open reading frame unlikely to encode a protein, based on experimental and comparative sequence data; partially overlaps the verified gene YOR083W	no
YOR396W	-1.14	YRF1-8	Uncharacterized	One of several telomeric Y' element-encoded DNA helicases, known as Y'-Help1 (Y'-HELicase Protein 1)	yes
YPL283W-A	-1.26	YPL283W-A	Dubious	Identified by gene-trapping, microarray-based expression analysis, and genome-wide homology searching	yes
YPR203W	-1.52	YPR203W	Uncharacterized	Putative protein of unknown function	yes
YPR204W	-1.52	YPR204W	Uncharacterized	Helicase-like protein encoded within the telomeric Y' element	yes
